# G-baToN: a versatile reporter system for cancer cell-stromal cell interactions

Rui Tang<sup>1\*</sup>, Christopher W. Murray<sup>2</sup>, Ian Linde<sup>4</sup>, Nicholas J. Kramer<sup>1,3</sup>, Zhonglin Lyu<sup>6</sup>, Min K. Tsai<sup>1</sup>, Leo Chen<sup>1</sup>, Hongchen Cai<sup>1</sup>, Aaron D. Gitler<sup>1,3</sup>, Edgar Engleman<sup>2,4,5</sup>, Wonjae Lee<sup>6</sup>, and Monte M. Winslow<sup>1,2,5\*</sup>

<sup>1</sup> Department of Genetics, Stanford University School of Medicine, Stanford, CA, USA

<sup>2</sup> Cancer Biology Program, Stanford University School of Medicine, Stanford, CA, USA

<sup>3</sup> Neuroscience Program, Stanford University School of Medicine, Stanford, CA, USA

<sup>4</sup> Immunology Program, Stanford University School of Medicine, Stanford, CA, USA

<sup>5</sup> Department of Pathology, Stanford University School of Medicine, Stanford, CA, USA

<sup>6</sup> Department of Neurosurgery, Stanford University School of Medicine, Stanford, CA, USA

\* Corresponding authors: Rui Tang: [tangrui@stanford.edu](mailto:tangrui@stanford.edu) and Monte M. Winslow: [mwinslow@stanford.edu](mailto:mwinslow@stanford.edu)

## ABSTRACT

Cell-cell interactions influence all aspects of development, homeostasis, and disease. In cancer, interactions between cancer cells and stromal cells play a major role in nearly every step of carcinogenesis. Thus, the ability to record cell-cell interactions would facilitate mechanistic delineation of the role of cancer microenvironment. Here, we describe GFP-based Touching Nexus (G-baToN) which relies upon nanobody-directed fluorescent protein transfer to enable sensitive and specific labeling of cells after cell-cell interactions. G-baToN is a generalizable system that enables physical contact-based labeling between various cell types, including diverse cancer-stromal cell pairs. A suite of orthogonal baToN tools enables reciprocal cell-cell labeling, interaction-dependent cargo transfer, and the identification of higher-order cell-cell interactions across a wide range of cell types. The ability to track physically interacting cells with these

simple and sensitive systems will greatly accelerate our understanding of the outputs of cell-cell interactions in cancer as well as across many biological processes.

## INTRODUCTION

Cell-cell interactions contribute to almost all physiological and pathological states (Deb, 2014; Komohara and Takeya, 2017; Konry et al., 2016; Zhang and Liu, 2019). Despite the explosion of interest in uncovering and understanding cellular heterogeneity in tissues and across disease states, the extent to which cell-cell interactions influence cell state, drive heterogeneity, and enable proper tissue function remains poorly understood (Konry et al., 2016; Tsioris et al., 2014; Zhang and Liu, 2019). Detailed analysis of the impact of defined cell-cell interactions has illuminated critical aspects of biology, however, these analyses have been limited to a small number of juxtacrine signaling axes that are tractable to study (Dustin and Choudhuri, 2016; Meurette and Mehlen, 2018; Yaron and Sprinzak, 2012).

Interactions between cancer cells and stromal cells play a central role in cancer initiation, progression, and metastasis (Kitadai, 2010; Orimo and Weinberg, 2006). While secreted factors relaying pro- or anti-tumor signals have been extensively investigated, the impact of direct physical interactions between cancer cells and stromal cells remains understudied (Bendas and Borsig, 2012; Dittmer and Leyh, 2014; Nagarsheth et al., 2017). A greater understanding of the constellation of direct interactions that cancer cells undergo will not only deepen our understanding of tumor ecology but also has the potential to uncover novel therapeutic opportunities (Nagarsheth et al., 2017; Swartz et al., 2012). Furthermore, how diverse cell-cell interactions differentially impact cancer cells at different stages of carcinogenesis and within different organ environment remains largely uncharacterized.

Molecular methods to profile cell state, including *in situ* approaches within intact tissues, largely fail to uncover the causal relationship between cell-cell interactions and the underlying biology (Giladi et al., 2020; Halpern et al., 2018). Computational and experimental methods to characterize cell-cell interactions yield additional layers of dimensionality, however, modalities to capture cell-cell interactions are limited (Boisset et al., 2018; Morsut et al., 2016; Pasqual et al., 2018). Much as diverse systems to detect and quantify protein-protein interactions have revolutionized our biochemical understanding of molecular systems, the development of novel systems to detect and quantify cell-cell interactions will accelerate the mapping of the interaction networks of multicellular systems.

Endogenous cell-cell interactions can result in transfer of surface proteins between cells, mainly through either trans-endocytosis or trogocytosis (Langridge and Struhl, 2017; Li et al., 2019; Ovcinnikovs et al., 2019). Thus, we sought to integrate this phenomenon with fluorescent protein tagging to label cells that have undergone direct interactions. We describe a surprising robust system (which we term GFP-based Touching Nexus or G-baToN) that enables sensitive and specific interaction-dependent labeling of cancer cells and various primary stromal cells, including endothelial cells, T cells and neurons. We extensively characterize this approach and describe several novel applications of this versatile system.

## RESULTS

### G-baToN enables cell-cell interaction-dependent labeling

To create a system where a fluorescent signal could be transferred between neighboring cells, we adapted a synthetic ligand-receptor system based on the expression of surface GFP

(sGFP) on sender cells and a cell surface anti-GFP ( $\alpha$ GFP) nanobody on receiver cells (Fridy et al., 2014; Lim et al., 2013; Morsut et al., 2016). Co-culturing sGFP sender cells with  $\alpha$ GFP receiver cells led to GFP transfer and labeling of the receiver cells (Figure 1A, B and supplementary Figure 1A). Receiver cell labeling required direct cell-cell contact, active membrane dynamics, and pairing between sGFP and its cognate  $\alpha$ GFP receptor (Figure 1C, D and Supplementary Figure 1B, C). Notably, sGFP transfer was accompanied by reduced GFP on the sender cells, downregulation of  $\alpha$ GFP from the surface of the receiver cells and was partially blocked by chemical inhibitors of endocytosis – all consistent with active GFP transfer and internalization into receiver cells (Supplementary Figure 1D-F).

To characterize the kinetics of G-baToN-mediated receiver cell labeling, we performed co-culture time course experiments with time-lapse imaging and flow cytometry readouts. Time-lapse imaging showed rapid transfer and internalization of GFP by receiver cells (Figure 1E and Supplementary Movie 1). GFP transfer could be detected within five minutes of co-culture and was half-maximal after six hours (Figure 1F and Supplementary Figure 1G). Importantly, GFP fluorescence in receiver cells decayed rapidly after isolation of touched receiver cells from sender cells, thus documenting the transient labeling of receiver cells (Supplementary Figure 1H). To determine the sensitivity of this system, we co-cultured receiver cells with different ratios of sender cells. The fraction of labeled receiver cells was proportional to the number of sender cells, and even the addition of very few sender cells (representing less than one sender cell to  $10^5$  receiver cells) was sufficient to label rare receiver cells (Figure 1G, H). Thus, the transfer of GFP to  $\alpha$ GFP-expressing cells is a rapid and sensitive method to mark cells that have physically interacted with a predefined sender population.

## **Fluorescence transfer efficiency is modulated by transmembrane domains and nanobody affinity**

To further characterize the interaction reporter system, we deconstructed the G-baToN design into three functional modules: 1) the transmembrane domain of  $\alpha$ GFP on receiver cell; 2) the pairing between GFP and  $\alpha$ GFP; and 3) the transmembrane domain of sGFP on sender cell. We initially used a published sGFP- $\alpha$ GFP pair which used the Notch1 transmembrane domain to link the LaG17- $\alpha$ GFP nanobody onto the receiver cell and the PDGFR transmembrane domain to link sGFP onto the sender cell (Morsut et al., 2016). Replacement of the Notch1 transmembrane domain of  $\alpha$ GFP with different transmembrane domains allowed us to quantify their impact on GFP transfer efficiency. The VEGFR2 transmembrane domain enabled the highest transfer efficiency, resulting in about a three-fold increase relative to the original design (Figure 2A-C). We next replaced the LaG17- $\alpha$ GFP nanobody with  $\alpha$ GFP nanobodies with varying affinity for GFP (Figure 2D, E). While nanobodies exhibiting the highest affinities performed similarly, we noted a minimal affinity required for GFP transfer (Figure 2F). Overall, the efficiency of GFP transfer correlated with GFP affinity. Lastly, permutation of transmembrane domain of sGFP on the sender cell revealed that the rate of retrograde transfer of  $\alpha$ GFP-VEGFR2-BFP from receiver to sender cells was influenced by the sGFP transmembrane domain (Figure 2G-I). The PDGFR transmembrane domain minimized bidirectional transfer and thus was the optimal design for minimizing retrograde transfer which could generate false-positive signals (Figure 2G-I). Collectively, the permutation of the transmembrane domains anchoring sGFP and  $\alpha$ GFP, as well as varying the  $\alpha$ GFP nanobody affinity enabled the identification of designs that maximize unidirectional receiver cell labeling.

## Tracking cancer-stroma interactions using G-baToN

Cancer cells interact with a variety of stromal cells at both the primary and metastatic sites (Kota et al., 2017; Nielsen et al., 2016). Thus, we employed the G-baToN system to record various cancer-stroma interactions in conventional 2D and 3D microfluidic culture systems as well as *in vivo*. Co-culturing sGFP-expressing lung adenocarcinoma cells with primary human umbilical vein endothelial cells (HUVECs) in a 2D format led to robust endothelial cell labeling (Figure 3A, B). Additionally, within 3D microfluidic chips, pre-seeded HUVECs expressing  $\alpha$ GFP were robustly labeled following co-incubation with sGFP-expressing lung adenocarcinoma cells over a 24-hour period (Figure 3E-G). Thus, the G-baToN system is able to efficiently record cancer cell-endothelial cell interactions across multiple culture conditions.

Given the importance of interactions with adaptive immune cells during carcinogenesis (Crespo et al., 2013; Joyce and Fearon, 2015), we assessed the ability of the G-baToN system to track the interaction of primary human CD4 and CD8 T cells with lung cancer cells.  $\alpha$ GFP-expressing CD4 and CD8 T cells that interacted with sGFP-expressing lung cancer cells in culture were specifically labeled (Figure 4A-C). To test the ability of the G-baToN system to capture cancer cell-T cell interactions *in vivo*, we established lung tumors from a sGFP-expressing lung adenocarcinoma cell line prior to intravenous transplantation of  $\alpha$ GFP-expressing CD4 T cells. 24 hours after T cell transplantation, over 60% of  $\alpha$ GFP-expressing CD4 T cells within the tumor-bearing lungs were labeled with GFP, while control CD4 T cells remained unlabeled (Figure 4D, E). Thus, the G-baToN system is capable of recording cancer cell-T cell interactions both *in vitro* and *in vivo*.

Recent studies have demonstrated a supportive role for neurons within the primary and metastatic niche in the context of brain (Venkatesh et al., 2019; Zeng et al., 2019). To record

cancer cell-neuron interactions, we co-cultured sGFP-expressing lung adenocarcinoma cells with primary cortical neurons expressing  $\alpha$ GFP. Physical contact between cancer cells and neuronal axons led to punctate-like GFP granule transport into receiver neuron (Figure 5A-B). These results demonstrate the successful application of G-baToN system to record a variety of cancer cell-stromal cell interactions.

### **G-baToN can be applied in a wide range of cell types**

To assess the generalizability of the G-baToN system across cell types, we expressed  $\alpha$ GFP in a panel of cell lines and primary cells. Each receiver cell type was able to uptake GFP from sGFP-expressing lung cancer sender cells upon cell-cell contact (Supplementary Figure 2A). Furthermore, diverse cancer cell lines and primary cell types expressing sGFP were able to transfer GFP to  $\alpha$ GFP-expressing HEK293 receiver cells (Supplementary Figure 2B-F). As anticipated, receiver cell labeling required sGFP-expression on the sender cell and  $\alpha$ GFP expression on the receiver cells. Thus, G-baToN-based labeling extends beyond transformed cell types and can label diverse primary cell types in co-culture.

To further test the generalizability of the system and determine whether primary cells can serve as both sender and receiver cells, we assessed GFP transfer between interacting primary cells in the context of two well-established heterotypic cell-cell interactions: endothelial cells interacting with smooth muscle cells and astrocytes interacting with neurons. Co-culturing sGFP-expressing HUVEC and  $\alpha$ GFP-expressing primary human umbilical vein smooth muscle cells (HUVSMC) resulted in efficient receiver smooth muscle cell labeling (Figure 3C,D). Furthermore, sGFP-expressing astrocytes were able to transfer GFP to  $\alpha$ GFP-expressing cortical

neurons (Figure 5C, D). Collectively, these results document the efficiency of G-baToN-based cell labeling across diverse cell types.

## **Implementation of multicolor labeling enables recording of reciprocal and higher-order interactions**

Given the high efficiency with which sGFP labels receiver cells upon interaction with cognate sender cells, we tested whether other surface antigen/antibody pairs could lead to protein transfer and labeling. Due to the cross reactivity of  $\alpha$ GFP with BFP, co-culture of surface BFP (sBFP) sender cells with  $\alpha$ GFP receiver cells generated BFP-labeled receivers (Fridy et al., 2014) (Supplementary Figure 3A, B). Orthogonal systems consisting of surface-mCherry/ $\alpha$ mCherry (LaM4)(Fridy et al., 2014) and surface-GCN4-GFP/ $\alpha$ GCN4 (single-chain variable fragment, scFV)(Tanenbaum et al., 2014) also led to efficient and specific receiver cell labeling (Supplementary Figure 3C-F). Thus, the G-baToN labeling system can be extended to additional antigen/antibody pairs.

We next integrated these orthogonal systems to enable reciprocal labeling and detection higher order multi-cellular interactions. Engineering cells with these orthogonal systems in an anti-parallel fashion should enable reciprocal labeling of both interacting cells. Co-culture of cells expressing sGFP and  $\alpha$ mCherry with cells expressing smCherry and  $\alpha$ GFP resulted in reciprocal labeling of both interacting cell types (Figure 6A, B, Supplementary Figure 4A). This reciprocal labeling system may be particularly useful when the interaction induces alteration in both interacting cell types. Using orthogonal ligand-receptor pairs, we also created an AND gate dual labeling strategy. Specifically, co-expression of  $\alpha$ mCherry and  $\alpha$ GFP on receiver cells enabled dual color labeling of receiver cells that had interacted with smCherry-expressing,



sGFP-expressing, or both sender cell types (Figure 6C, D, Supplementary Figure 4B).

Analogously, we achieved dual color labeling of receiver cells by leveraging the ability of  $\alpha$ GFP to bind both sGFP and sBFP (Figure 6E, F). Thus, derivatives of the G-baToN system allow for additional degrees of resolution of complex cell-cell interactions.

## **Labeling with HaloTag-conjugated fluorophores enhances sensitivity and signal persistence**

We next extended our labeling system further by generating sender cells expressing the HaloTag protein fused to sGFP (sHalo-GFP; Figure 7A)(Los et al., 2008). Covalent attachment of a synthetic fluorophore to sHalo-GFP enabled specific loading onto sender cells (Figure 7B). Co-culture of Alexa Fluor 660 (AF660)-loaded sHalo-GFP sender cells with  $\alpha$ GFP receiver cells enabled co-transfer of both GFP and AF660 (Figure 7C). Compared to GFP, transfer of the chemical fluorophore using sHalo-GFP-based labeling of receiver cells led to increased signal-to-noise ratio and higher sensitivity (Figure 7C, D). Importantly, changing from a protein (GFP) to a chemical fluorophore also extended the half-life of labeling, thus enabling partially tunable persistence of labeling after touching (Figure 7E).

Next, we coupled the enhanced properties of chemical fluorophore-based labeling with the generalizability of the GCN4-baToN system to assemble a robust and versatile system to label receiver cells that have interacted with two or more different sender cell types (Figure 7F). Co-culturing  $\alpha$ GCN4 receiver cells with AF488- and AF660-loaded sGCN4-Halo sender cells generated a spectrum of receiver cells with varying degrees of AF488 and AF660 labeling (Figure 7G). Importantly, the ratio of AF488 to AF660 transferred to the dually labeled receiver cells strongly correlated with the ratio of the two sGCN4-Halo sender populations within the co-

culture, suggesting that this system can quantitatively measure higher-order cell-cell interactions (Figure 7H).

## **The G-baToN system can function as a vehicle for molecular cargo**

Given the high efficiency of protein transfer using the G-baToN system, we investigated whether cargo molecules could be co-transferred with GFP from sender cells to receiver cells. In addition to the co-transfer of Halo-Tag with sGFP, we also generated sender cells with surface expression of a GFP-tdTomato fusion protein (sGFP-Tom) and uncovered stoichiometric tdTomato and GFP transfer to  $\alpha$ GFP receiver cells (Figure 8A, B). Beyond fluorescent labels, we tested whether other cargo could be transferred to receiver cells. We generated sGFP-PuroR-expressing sender cells and found that co-culture of sGFP-PuroR sender cells with  $\alpha$ GFP receiver cells led to moderate puromycin resistance of touched receiver cells (Figure 8C, D). Finally, loading of sGCN4-HaloTag sender cells with HaloTag-conjugated, AF647-coupled ssDNA prior to co-culture with  $\alpha$ GCN4 receiver cells revealed successful co-transfer of fluorescently labeled ssDNA to receiver cells (Figure 8 E-G). Thus, baToN systems enable contact-dependent transport of different macromolecules between cells.

## **DISCUSSION**

Here we developed and optimized a novel cell-cell interaction reporter system and showed that this G-baToN system can record diverse cancer cell-stromal cell interactions in a specific and sensitive manner. Our data document the ability of diverse primary cell types to serve as both sender and receiver cells, suggesting that the G-baToN system is not only simple, sensitive and rapid, but also generalizable. Multicolor derivatives of G-baToN enable qualitative

and quantitative analyses of higher-order interactions involving more than two cell types. Finally, the ability to co-transfer protein, DNA and chemical cargo suggests that this platform could be leveraged to manipulate target cell function.

Cancer cell-stromal cell interactions can be relatively stable (such as cancer cell interactions with other cancer cells and stromal cells) or transient (such as cancer cell-immune cell interactions and circulating tumor cell (CTC) interactions with endothelial cells during metastasis). The G-baToN system labels receiver cells through transfer of cell surface GFP which, due to its lability, ensures only transient labeling. This is similar to other cell-cell interaction labeling systems (Supplementary Figure 5). Transient labeling is sufficient to label stable cancer cell-stromal cell interactions and many other diverse cell-cell interactions when sender cells consistently express GFP (Figure 1F). This transient labeling should allow dynamic interactions to be detected, ensuring that the labelled receiver cells either are in contact with, or have recently interacted with sender cells.

Further optimization of the G-baToN systems could allow shorter or longer term labeling within different biological systems. For example, a G-baToN system where sGFP is inducible may allow physical interactions between cancer cells and stromal cells to be captured with even more precise temporal control. Conversely, we have shown that using chemical fluorophores significantly extends label persistence within receiver cells (Figure 7E), which can be used for longer term labeling of receiver cells that undergo dynamic interactions. Future development of systems that allow for stable receiver cell labeling (perhaps through genetic modification of receiver cells), will facilitate the study of cell-cell interaction induced cell fate determination via contact-dependent lineage tracing.

As with other cell-cell interaction reporter systems, the G-baToN system relies on cell surface ligand-receptor recognition (Supplementary Table 1-2). While LIPSTIC-based labeling is driven by endogenous ligand-receptor interactions, SynNotch and G-baToN systems rely on exogenous ligand-receptor pairs (Morsut et al., 2016; Pasqual et al., 2018). Consequently, these systems could stabilize normal cell-cell interactions. It is possible that tuning the affinity or expression level of the nanobody could minimize this effect. Inducible G-baToN systems may circumvent these issues, thus ensuring the recording of only *bona fide* interactions. Given that G-baToN-based cell-cell interaction reporter systems can be used as a discovery approach, the consequences of these interactions can be validated by orthogonal methods in the absence of exogenous ligand-receptor pairs.

An interesting advantage of the G-baToN system is its ability to mediate cargo transfer. We demonstrated the feasibility of transferring small molecules (HaloTag ligand, Figure 7), functional proteins (puromycin resistant protein, Figure 8C-D), and non-protein macromolecules (ssDNA, Figure 8E-G). Transferred cargo proteins may be able to modify receiver cell signaling or promote cell death. In the future, additional design features could allow cancer cell-stromal cell interaction dependent drug delivery, cell-cell interaction facilitated sgRNA transfer between interacting cells, and digital recording of cell-cell interaction via DNA-barcode transfer. Thus, we expect the G-baToN system to facilitate an even wider array of discoveries about cell-cell interactions in cancer, across other physiological or pathological processes, and within different model organisms.

The simplicity of this two-component system, combined with its generalizability across cell types, excellent foreground to background, and rapid labeling, should enable facile analysis of the dynamics of cellular interaction. These types of approaches have the potential to have a

broad impact on our ability to understand the outputs of cell-cell interactions in cancer and various other biological systems.

## Figure Legends

### **Figure 1. GFP-based Touching Nexus (G-baToN) leads to cell-cell interaction-dependent receiver cell labeling.**

**a.** Schematic of the G-baToN system. Surface GFP (sGFP) on a sender cell is transferred to a receiver cell expressing a cell surface anti-GFP nanobody ( $\alpha$ GFP) leading to GFP labeling of the “touched” receiver.

**b.** GFP transfer from sGFP-expressing KPT lung cancer sender cells (marked by intracellular tdTomato) to  $\alpha$ GFP-expressing 293 receiver cells. Receiver cell labeling is sGFP- and  $\alpha$ GFP-dependent. Control sender cells do not express sGFP. Control receiver cells do not express  $\alpha$ GFP. Cytoplasmic GFP (Cyto-GFP) is not transferred to receiver cells. Sender and receiver cells were seeded at a 1:1 ratio and co-cultured for 24 hours. Receivers were defined as Tomato<sup>neg</sup>PI<sup>neg</sup> cells.

**c.** GFP transfer to 293 receiver cells requires direct cell-cell contact. Receiver cells separated from sender cells by a transwell chamber are not labeled. Sender and receiver cells were seeded in upper and lower chambers respectively at a 1:1 ratio and cultured for 24 hours. Receivers were defined as Tomato<sup>neg</sup>PI<sup>neg</sup> cells.

**d.** GFP transfer to 293 receiver cells requires sGFP- $\alpha$ GFP interaction and is blocked by anti-GFP antibody in a dose-dependent manner. sGFP sender cells were pre-incubated with the indicated

concentration of anti-GFP antibody for 2 hours, washed with PBS, and then co-cultured with receiver cells at a 1:1 ratio for 24 hours. Receivers were defined as Tomato<sup>neg</sup>PI<sup>neg</sup> cells.

**e.** Time-lapse imaging of GFP transfer from a sGFP-expressing sender cell to an  $\alpha$ GFP-expressing receiver cell. Time after contact is indicated. Receiver cell is outlined with white dashed line. Scale bar: 10  $\mu$ m.

**f.** Analysis of GFP Mean Fluorescence Intensity (MFI) of  $\alpha$ GFP receiver cells (marked by intracellular BFP) co-cultured with sGFP sender cells (marked by intracellular tdTomato) co-cultured for the indicated amount of time. Sender and receiver cells were seeded at a 1:1 ratio. Receivers were defined as Tomato<sup>neg</sup>PI<sup>neg</sup>BFP<sup>pos</sup> cells.

**g.** Percentage of labeled  $\alpha$ GFP receiver cells after co-culture with different numbers of sender cells for 24 hours. Receivers were defined as Tomato<sup>neg</sup>PI<sup>neg</sup>BFP<sup>pos</sup> cells.

**h.** Detection of rare labeled  $\alpha$ GFP receiver cells after co-culture with sGFP sender cells at approximately a 1:10<sup>5</sup> ratio for 24 hours. Receivers were defined as Tomato<sup>neg</sup>PI<sup>neg</sup>BFP<sup>pos</sup> cells.

## **Figure 2. Transmembrane domains and the nanobody affinity impact sGFP transfer and receiver cell labeling.**

**a.** Schematic of the sender and receiver cells used to determine the impact of different  $\alpha$ GFP transmembrane (TM) domains. TM domains contain the TM domain itself as well as membrane proximal regions from the indicated mouse (m) and human (h) proteins.

**b.** Different TM domains impact cell surface  $\alpha$ GFP expression on 293 receiver cells. Membrane  $\alpha$ GFP was accessed by anti-Myc staining. Control receiver cells do not express any nanobody. Mean +/- SD of Myc MFI in triplicate cultures is shown.

**c.** VEGFR2 TM domain on  $\alpha$ GFP receivers enables highest GFP transfer efficiency. Receiver cells expressing  $\alpha$ GFP linked by different TM domains were co-cultured with sGFP sender cells at a 1:1 ratio for 6 hours. Receivers were defined as Tomato<sup>neg</sup>PI<sup>neg</sup> cells.

**d.** Schematic of the sender and receiver cells used to determine the impact of different  $\alpha$ GFP nanobodies on G-baToN-based labeling.

**e.** Different nanobodies exhibit different levels of expression on 293 receiver cells. Total  $\alpha$ GFP expression was assessed by BFP intensity. Mean +/- SD of GFP MFI in triplicate cultures is shown.

**f.**  $\alpha$ GFP affinity influences transfer of GFP to touched 293 receiver cells. Receiver cells expressing different  $\alpha$ GFP nanobodies were co-cultured with sGFP sender cells at a 1:1 ratio for 6 hours. GFP transfer was assessed by flow cytometry. GFP intensity on Tomato<sup>neg</sup>PI<sup>neg</sup>BFP<sup>pos</sup> receiver cells is shown as mean +/- SD of triplicate cultures.

**g.** Schematic of the sender and receiver cells used to determine the impact of different sGFP TM domains on G-baToN-based labeling. TM domains contain the TM domain itself as well as membrane proximal regions from the indicated mouse (m) and human (h) proteins.

**h.** Different TM domains on sGFP impact its expression in 293 sender cells. sGFP expression in sender cells was assessed by flow cytometry for GFP. Mean +/- SD of GFP MFI in triplicate cultures is shown.

**i.** PDGFR TM domain on sGFP minimized retrograde transfer of  $\alpha$ GFP from receiver cells to 293 sGFP sender cells.  $\alpha$ GFP transfer to sGFP senders were determined as the percentage of mCherry<sup>pos</sup>GFP<sup>pos</sup> sender cells that were also BFP<sup>pos</sup>. Cells were co-cultured for 6 hours at a 1:1 ratio. Mean +/- SD of triplicate cultures is shown.

### **Figure 3. G-baToN can be used for touching-based labeling between cancer cells and endothelial cells.**

**a, b.** G-baToN can detect cancer cell-endothelial cell (EC) interactions. HUVECs expressing  $\alpha$ GFP were co-cultured with or without Tomato<sup>pos</sup> sGFP-expressing lung cancer sender cells at a 1:1 ratio for 24 hours. (a) Representative images of Tomato<sup>pos</sup> sGFP-expressing lung cancer sender cells co-cultured with either control HUVEC receiver cells (HUVECs expressing BFP) or  $\alpha$ GFP HUVEC receiver cells at a 1:1 ratio for 24 hours. Scale bars = 50  $\mu$ m. (b) MFI of GFP on PI<sup>neg</sup>Tomato<sup>neg</sup>BFP<sup>pos</sup>CD31<sup>pos</sup> Receiver cells was assessed by flow cytometry and is shown as mean +/- SD of triplicate cultures. \*\* p<0.01, n=3.

**c,d.** G-baToN can detect endothelial cell (EC)-smooth muscle cell (SMC) interactions. Primary human umbilical artery smooth muscle cells (HUASMC) expressing  $\alpha$ GFP were co-cultured with or without sGFP-expressing HUVEC senders at a 1:1 ratio for 24 hours. (c) Representative images of sGFP-expressing HUVEC sender cells co-cultured with either control HUASMC receiver cells (expressing BFP) or  $\alpha$ GFP HUASMC receiver cells at a 1:1 ratio for 24 hours. Scale bars = 50  $\mu$ m. (d) MFI of GFP on PI<sup>neg</sup>BFP<sup>pos</sup> receiver cells was assessed by flow cytometry and is shown as mean +/- SD of triplicate cultures. \*\* p<0.01, n=3.

**e,f,g.** G-baToN can detect cancer cell-endothelial cell (EC) interactions in 3D-microfluidic culture. (e) Details on design of 3D-microfluidic devices for cancer cell-endothelial cell co-culture. (f) Representative images of Tomato<sup>pos</sup> sGFP-expressing lung cancer sender cells co-cultured with either control HUVEC receiver cells (HUVECs expressing BFP) or  $\alpha$ GFP HUVEC receiver cells at a 1:10 ratio for 24 hours. Scale bars = 200  $\mu$ m. (g) Average number of GFP<sup>pos</sup> HUVEC after co-culture with cancer cells for 24 h. 10 areas from three chips with 200X magnification were used for the quantification. \*\* p<0.01, n = 10.



**Figure 4. G-baToN can detect T cells-cancer cells interactions.**

**a,b,c.** G-baToN can detect cancer cell-T cell interactions in vitro. (a) Primary human CD4<sup>pos</sup> or CD8<sup>pos</sup> T cells were co-cultured with sGFP-expressing lung cancer sender cells (A549 cells) at a 2:1 ratio for 24 hours. Representative image of A549 cell and CD4 T cell interactions. Scale bars = 10  $\mu$ m. (b,c) A549 cells expressing sGFP can transfer GFP to  $\alpha$ GFP primary human CD4<sup>pos</sup> (b) or CD8<sup>pos</sup> (c) T cells after co-culture at a 1:1 ratio for 24 hours. Receivers were defined as Near-IR<sup>neg</sup>BFP<sup>pos</sup>CD4<sup>pos</sup>/CD8<sup>pos</sup> T cells.

**d,e.** G-baToN can detect cancer cell-T cell interactions in vivo. (d) Experiment design for cancer cell-T cell interactions in vivo. 1X10<sup>6</sup> sGFP-expressing lung cancer sender cells were transplanted into NSG mice at day 0. 4X10<sup>6</sup>  $\alpha$ GFP primary human CD4<sup>pos</sup> T cell were transplanted into tumor-bearing mice at day 21. 1 day after T cell transplantation (day 22), T cells in mouse lung were analyzed via FACS. (e) sGFP-expressing cancer cell can transfer GFP to  $\alpha$ GFP-expressing primary human CD4<sup>pos</sup> T cells. Receives were defined as PI<sup>neg</sup>BFP<sup>pos</sup>CD4<sup>pos</sup>T cells.

**Figure 5. G-baToN can detect neuron-cancer cell, neuron-astrocyte interactions.**

**a.** Representative image of sGFP-expressing cancer sender cells co-cultured with either control neuron receivers or  $\alpha$ GFP neuron receivers at a 1:1 ratio for 24 hours. Neurons were stained with Microtubule Associated Protein 2 (Map2). Scale bars = 50  $\mu$ m.

**b.** Quantification of supplementary Figure 5a using images from 10 different fields. Each dot represents a field. The bar indicates the mean  $\pm$  SD. GFP<sup>pos</sup> neurons were defined as Map2<sup>pos</sup>Tomato<sup>neg</sup> cells with GFP. \*\* p<0.01, n=10.

**c.** Representative images of sGFP-expressing astrocyte sender cells co-cultured with either control neuron receivers or  $\alpha$ GFP neuron receivers at a 1:2 ratio for 24 hours. Neurons were stained with Map2. Scale bars = 50  $\mu$ m. Higher magnification of the boxed areas are shown on the right.

**d.** Quantification of Figure 5c using images from 10 different fields. Each dot represents a field. The bar indicates the mean  $\pm$  SD. GFP<sup>pos</sup> neurons were defined as Map2<sup>pos</sup> cells with GFP. \*\* p<0.01, n=10.

# **Figure 6. Multicolor-baToN systems enable recording of higher order interactions.**

**a.** Diagram of the Reciprocal-baToN system. Cell A expresses sGFP and  $\alpha$ mCherry (tagged by intracellular BFP), Cell B expresses smCherry and  $\alpha$ GFP (tagged by Myc-tag).

**b.** Representative FACS plots of cell A and cell B monocultures (left 2 panels) and after co-culture at a 5:1 ratio for 24 hours. Percent of labeled cells is indicated as mean  $\pm$  SD of triplicate cultures.

**c.** Schematic of the AND gate-baToN system. sGFP and smCherry sender cells express either sGFP or mCherry. Dual receiver cells express both  $\alpha$ GFP (LaG17, tagged by Myc-tag) and  $\alpha$ mCherry (LaM4, tagged by intracellular BFP).

**d.** Representative FACS plots of dual receiver 293 cells cultured with the indicated 293 sender cells at 1:1 (for single sender cell) or 1:1:1 (for dual sender cells) ratios. Percent of labeled receiver cells (gated as BFP<sup>pos</sup>) after 24 hours of co-culture is indicated as mean  $\pm$  SD of triplicate cultures.

e. Diagram of the BFP/GFP AND gate-baToN system. sBFP sender cells express intracellular Tomato and surface BFP, sGFP sender cells express intracellular Tomato and surface GFP. Common receiver cells expressed  $\alpha$ GFP.

f. Representative FACS plots of common receiver 293 cells cultured with the indicated Tomato<sup>pos</sup> sender cells at 1:1 (for single sender cell) or 1:1:1 (for dual sender cells) ratios. Receiver cells were gated as Tomato<sup>neg</sup>PI<sup>neg</sup>. Percent of labeled common receiver cells after 24 hours of co-culture is indicated as mean +/- SD of triplicate cultures.

**Figure 7. The HaloTag-baToN system enable quantitative and sensitive cell-cell interaction-dependent receiver cell labeling.**

a. Diagram of HaloTag-baToN system. Sender cells (marked by intracellular 2A-mCherry) express surface HaloTag-GFP fusion which can be loaded with HaloTag ligands (in this example AF660). Receiver cells express  $\alpha$ GFP (LaG17, tagged by intracellular BFP).

b. Labeling HaloTag-expressing sender cells with AF660 fluorophore. Representative FACS plots of KP (lung adenocarcinoma) sender cells expressing either sGFP or sGFP-sHaloTag incubated with AF660-conjugated HaloTag ligand for 5 minutes on ice. AF660 specifically labeled sHaloTag-GFP sender cells but not sGFP sender cells.

c. Representative plot of GFP and AF660 intensity in  $\alpha$ GFP 293 receiver cells co-cultured with HaloTag-GFP KP (lung adenocarcinoma) sender cells at a 1:1 ratio for 6 hours. Receivers were defined as mCherry<sup>neg</sup>PI<sup>neg</sup>BFP<sup>pos</sup> cells.

d. AF660 transfer to  $\alpha$ GFP 293 receiver cell is rapid after cell-cell interaction. AF660 MFI shift was detected after mixing sHalo-GFP senders and  $\alpha$ GFP receivers and co-culture for 10 minutes.

AF660 MFI shift was more dramatic than GFP. Receivers were defined as mCherry<sup>neg</sup>PI<sup>neg</sup>BFP<sup>pos</sup> cells.

**e.** Slower AF660 quenching in touched receiver cells after removing sHalo-GFP senders. After 6 hours co-culture, GFP/AF660 positive receiver cells were purified via FACS. Analysis of GFP/AF660 MFI in purified receiver cells showed rapid GFP degradation but slower AF660 quenching. Receivers were defined as mCherry<sup>neg</sup>PI<sup>neg</sup>BFP<sup>pos</sup> cells.

**f.** Diagram of dual color GCN4-HaloTag-baToN system. Sender cells (marked by intracellular 2A-mCherry) express surface 4XGCN4 associated with HaloTag, loaded with either AF488- or AF660- conjugated HaloTag ligand. Receiver cells express  $\alpha$ GCN4 (tagged by intracellular BFP).

**g.** Representative FACS plots of  $\alpha$ GCN4 receiver cells co-cultured with the indicated sender cells at 1:1 (for single sender cell) or 1:1:1 (for dual sender cells) ratios. Percent of labeled receiver cells (gated as mCherry<sup>neg</sup>PI<sup>neg</sup>BFP<sup>pos</sup>) after 6 hours of co-culture is indicated as mean +/- SD of triplicate cultures.

**h.** AF488/AF660 GCN4-HaloTag sender ratio in the co-culture directly proportional to AF488/AF660 intensity (MFI) of  $\alpha$ GCN4 receiver after 6 hours of co-culture. Receivers were defined as mCherry<sup>neg</sup>PI<sup>neg</sup>BFP<sup>pos</sup> cells.

**Figure 8. The G-baToN system can co-transfer cargo molecules into touched receiver cells.**

**a.** Diagram of surface tdTomato-GFP (sGFP-Tom) co-transfer into touched receiver cells. Sender cell expresses sGFP-tdTomato and receiver cell expresses  $\alpha$ GFP (tagged by intracellular BFP).

**b.** Representative FACS plots of  $\alpha$ GFP 293 receiver cells cultured with the indicated sender cells at 1:1 ratio for 24 hours. Percent of GFP/Tomato dual labeled receiver cells is indicated as mean  $\pm$  SD of BFP<sup>pos</sup> cells from triplicate cultures.

**c.** Diagram of GFP-PuroR co-transfer system. Sender cell expresses surface GFP associated with PuroR (marked by intracellular tdTomato), receiver cell expresses  $\alpha$ GFP (tagged by intracellular BFP). PuroR: Gcn5-related N-acetyltransferase.

**d.** Co-transfer of GFP-PuroR from sGFP-PuroR sender cells to  $\alpha$ GFP 293 receiver cells confers puromycin resistance to receiver cells. Control, sGFP or sGFP-PuroR sender cells were co-cultured with  $\alpha$ GFP 293 receiver cells for 24 hours at a 4:1 ratio before treatment with different dose of puromycin for 48 hours. tdTomato<sup>neg</sup>PI<sup>neg</sup>BFP<sup>pos</sup> cell numbers were counted via FACS.

**e.** Diagram of using GCN4-HaloTag sender to transfer ssDNA into  $\alpha$ GCN4 receiver cells. Sender cells (marked by intracellular 2A-mCherry) express surface 4XGCN4 associated with HaloTag, loaded with 5' HaloTag ligand, 3' biotin dual conjugated ssDNA (21 nt), then stained with Avidin-AF647. Receiver cells express  $\alpha$ GCN4 (tagged by intracellular BFP).

**f.** Loading of sender cells with ssDNA. Representative FACS plots of 293 sender cells expressing either sGCN4 or sGCN4-Halo were loaded with 5' HaloTag-ligand, 3' biotin dual conjugated ssDNA (21nt), then stained with Avidin-AF647. AF647 specifically labeled loaded sGCN4-Halo sender cells but not sGCN4 sender cells.

**g.** Representative plot of AF647 intensity in  $\alpha$ GCN4 293 receiver cells co-cultured with GCN4-HaloTag 293 sender cells at a 1:1 ratio for 6 hours. Receivers were defined as mCherry<sup>neg</sup>PI<sup>neg</sup>BFP<sup>pos</sup> cells.

**Supplementary Figure 1. GFP transfer requires direct GFP-αGFP interaction.**

**a.** GFP protein is transferred to receiver cells. Western blot analysis of FACS purified Control and αGFP receiver 293 cells cultured in isolation or co-culture with sGFP Tomato-positive sender cells (mouse KPT lung cancer cells) for 24 hours. sGFP but not Tomato is present in touched αGFP receiver cells. Human mitochondrial antigen (hu-Mito) is a marker for receiver cells. GAPDH shows loading. Rightmost lane is sGFP sender cells.

**b.** GFP cannot be transferred from fixed sGFP sender cells to live αGFP receiver cells. sGFP sender cells were fixed in 1% PFA for 5 minutes and washed with PBS before co-cultured with αGFP receiver cells at a 1:1 ratio for 24 hours. Receivers were defined as Tomato<sup>neg</sup>PI<sup>neg</sup>BFP<sup>pos</sup> cells.

**c.** GFP transfer to 293 receiver cells required sGFP-αGFP recognition. GFP is transferred from sGFP sender cells to αGFP-receiver cells but not from sGFP sender cells to αmCherry-receiver cells. Control receiver cells do not express any nanobody. Sender and receiver cells were co-cultured at a 1:1 ratio for 24 hours. Receivers were defined as Tomato<sup>neg</sup>PI<sup>neg</sup>BFP<sup>pos</sup> cells.

**d.** GFP transfer to receiver cells is accompanied by a reduction of GFP on the sender cells. GFP expression on sender cells after 24 hour co-culture with control or αGFP-expressing 293 receiver cells at a 1:1 ratio. Co-culture with αGFP expressing but not control receiver cells reduced GFP on sGFP sender cells. Senders were defined as Tomato<sup>pos</sup>DAPI<sup>neg</sup>BFP<sup>neg</sup> cells.

**e.** GFP transfer is accompanied with αGFP internalization on receiver cells. Analysis of surface αGFP (Myc-tag) on 293 receiver cell co-cultured for 24 hours with sGFP sender cells. Receivers were defined as Tomato<sup>neg</sup>PI<sup>neg</sup> cells.

**f.** GFP transfer to 293 receiver cells is partially dependent on membrane dynamics of endocytosis. Both a clathrin inhibitor (Pitstop, 20 μM) and a dynamin inhibitor (Dyngo 4a, 10

μM) partially inhibit GFP transfer from sGFP sender cells to αGFP receivers. Inhibitors were present during the 24 hour co-culture. Receivers were defined as Tomato<sup>neg</sup>PI<sup>neg</sup> cells.

**g.** GFP transfer to αGFP 293 receiver cells can be very rapid. A shift in GFP MFI was detected 5 minutes after mixing sGFP sender cells with αGFP receiver cell. Receivers were defined as Tomato<sup>neg</sup>PI<sup>neg</sup>BFP<sup>pos</sup> cells. MFI mean +/- SD of triplicate cultures is shown.

**h.** Rapid GFP degradation in touched receiver cells after removal of the sGFP sender cells. After 6 hours co-culture, GFP positive receiver cells were purified by FACS followed by culture without sender cells. Receivers were defined as mCherry<sup>neg</sup>PI<sup>neg</sup>BFP<sup>pos</sup> cells. GFP MFI in receiver cells reduced rapidly (T<sub>1/2</sub> approximately 2 hours). MFI mean +/- SD of triplicate cultures is shown.

## **Supplementary Figure 2. G-baToN is a generalized system that can be used for touching-based labeling between various cell types.**

**a.** Many different cell lines and primary cell types can serve as receiver cells. Receiver cells expressing αGFP were co-cultured with sGFP-expressing KPT sender cells for 24 hours. MFI of GFP on Tomato<sup>neg</sup>PI<sup>neg</sup>BFP<sup>pos</sup> receiver cells was assessed by FACS analysis and is shown as fold change relative to monocultured receiver cells. For lung epithelial cells and kidney epithelial cells MFI of GFP on Tomato<sup>neg</sup>PI<sup>neg</sup>BFP<sup>pos</sup>EpCAM<sup>pos</sup> cells are shown as mean +/- SD of triplicate cultures. SkMC: skeletal muscle cells. Astro: Astocytes. Hepato: hepatocytes. Spleno: splenocytes.

**b.** Many different cell lines and primary cell types can serve as sender cells. Sender cells expressing sGFP were co-cultured with αGFP 293 receiver cells for 24 hours. MFI of GFP on mCherry<sup>neg</sup>PI<sup>neg</sup>BFP<sup>pos</sup> receiver cells was assessed by FACS and is shown as fold change

relative to monocultured 293 receiver cells. Mean +/- SD of triplicate cultures is shown.

**c,d,e,f.** Diverse primary mouse cells expressing sGFP can transfer GFP to  $\alpha$ GFP 293 receivers. Different primary sender cells were first sorted based on their cell surface markers, then transduced with lentiviral vectors expressing sGFP before being co-cultured with  $\alpha$ GFP 293 receiver cells for 24 hours. Percentage of mCherry<sup>neg</sup>PI<sup>neg</sup>BFP<sup>pos</sup>GFP<sup>pos</sup> receiver cells was assessed by flow cytometry. For each primary sender, approximate sGFP<sup>pos</sup> sender :  $\alpha$ GFP<sup>pos</sup> receiver ratio is indicated: c. Lung epithelial cells (1:180) (sorted EpCam<sup>pos</sup> cells from dissociated adult lung); d. Kidney epithelial cells (1:20) (sorted EpCam<sup>pos</sup> cells from dissociated adult kidney); e. Splenocyte (1:20); f. Cardiomyocyte (1:5) (sorted Sirpa<sup>pos</sup> cells from dissociated adult heart). Percent of labeled cells is indicated as mean +/- SD of triplicate cultures.

**Supplementary Figure 3. X-baToN systems enable fluorescent labeling via various antigen-nanobody/scFV pairs.**

**a.** Schematic of the surface BFP (sBFP)-baToN system. Sender cell (marked by intracellular tdTomato) expresses sBFP and receiver cell expresses  $\alpha$ GFP.

**b.** The cross reactivity of  $\alpha$ GFP with BFP allow BFP to be transferred from sBFP sender to  $\alpha$ GFP receiver cells. sBFP senders and  $\alpha$ GFP receivers were co-cultured at 1:1 ratio for 24 hours. Receivers were defined as toTomato<sup>neg</sup>PI<sup>neg</sup> cells. BFP MFI of receiver cells is shown as mean +/- SD of triplicate cultures.

**c.** Schematic of the surface mCherry (smCherry)-baToN system. Sender cell (marked by intracellular GFP) expresses smCherry and receiver cell expresses  $\alpha$ mCherry (tagged by intracellular BFP)



**d.** The pairing between mCherry and  $\alpha$ mCherry enable mCherry transfer from smCherry 293 sender cells to  $\alpha$ mCherry-expressing 293 receiver cells. smCherry senders are not able to transfer mCherry to  $\alpha$ GFP receiver cells. smCherry sender cells were co-cultured with  $\alpha$ GFP or  $\alpha$ mCherry receiver cells at a 1:1 ratio for 24 hours. Receivers were defined as GFP<sup>neg</sup>BFP<sup>pos</sup> cells. mCherry MFI of receiver cell is shown as mean +/- SD of triplicate cultures. smCherry 293 sender is not able to transfer mCherry to  $\alpha$ GFP 293 receiver.

**e.** Schematic of the surface GCN4 (sGCN4)-baToN system. Sender cells (marked by intracellular 2A-mCherry) express cell surface 4X GCN4 peptide fused with GFP. Receiver cells express a cell surface anti-GCN4 single-chain variable fragment (scFV;  $\alpha$ GCN4, tagged by intracellular BFP).

**f.** The pairing between GCN4 and  $\alpha$ GCN4 enables co-transfer of GFP from 4X sGCN4-GFP senders to  $\alpha$ GCN4 receivers 24 hours after co-culture at a 1:1 ratio. Receivers were defined as mCherry<sup>neg</sup>PI<sup>neg</sup>BFP<sup>pos</sup> cells. GFP MFI of receiver cell is shown as mean +/- SD of triplicate cultures. sGFP sender are not able to transfer GFP to  $\alpha$ GCN4 receivers.

#### **Supplementary Figure 4. Dual color-baToN systems enable labeling in complex cell-cell interaction systems.**

**a.** Representative image of reciprocal labeling of cell A and cell B co-cultured for 24 hours. Cells are outlined with a white dashed line. Cell A is BFP and GFP double positive and Cell B is mCherry positive. Touched cell A is BFP, GFP and mCherry triple positive and touched cell B is GFP and mCherry double positive (pointed out by white letter). Scale bar: 10  $\mu$ m.

**b.** Representative image of dual receiver cells co-cultured with indicated sender cells. Cells are outlined with a white dashed line. Dual receiver cells are BFP positive and sender touched dual receiver cells are pointed out by white arrows. Scale bar: 10  $\mu$ m.

## **Supplementary Figure 5. Features of the SynNotch, LIPSTIC, and G-BaToN cell-cell interaction reporter systems.**

Overview of systems that enable labeling of cells after cell-cell contact.

## **ACKNOWLEDGEMENTS**

We thank the Stanford Shared FACS and Cell Sciences Imaging Facilities for technical support; A. Orantes for administrative support, N. Kipniss and Y.T. Shue for critical reagents; D. Feldser, J. Sage, Y. Chien, N. Kipniss and members of the Winslow laboratory for helpful comments. R.T. was supported by a Stanford University School of Medicine Dean's Postdoctoral Fellowship and a TRDRP Postdoctoral fellowship (27FT-0044). C.W.M. was supported by the NSF Graduate Research Fellowship Program and an Anne T. and Robert M. Bass Stanford Graduate Fellowship. W.L. was supported by a NCI Career Development Award (NIH K25-CA201545). This work was supported by NIH R01-CA175336 (to M.M.W), NIH R01-CA207133 (to M.M.W) and NIH R01-CA230919 (to M.M.W) and in part by the Stanford Cancer Institute support grant (NIH P30-CA124435), 1S10OD01227601 from the National Center for Research Resources (NCRR) and S10RR027431-01 from National Institutes of Health (NIH).

## **METHODS**

*Cells, Plasmids and Reagents:*

HEK-293T, B16-F10, A549, H460 and HUVEC cells were originally purchased from ATCC; HUASMC were purchased from PromoCell (C-12500); H82 cells were kindly provided by Julien Sage (Stanford School of Medicine); KP (238N1) and KPT (2985T2) lung adenocarcinoma cells were generated in the Winslow Lab. HEK-293T, 238N1, 2985T2 and B16-F10 cells were cultured in DMEM containing 10% FBS, 100 units/mL penicillin and 100 µg/mL streptomycin. A549, H460 and H82 cells were cultured in RPMI1640 media containing 10% FBS, 100 units/mL penicillin and 100 µg/mL streptomycin. HUVECs were cultured in Vascular Cell Basal Medium (ATCC, PCS-100-030) with Endothelial Cell Growth Kit (ATCC, PCS-100-041); HUASMC were cultured in Smooth Muscle Cell Growth Medium 2 (PromoCell, C-22062). All cell lines were confirmed to be mycoplasma negative (MycoAlert Detection Kit, Lonza). Pitstop (ab120687) and Dyngo 4a (ab120689) were purchased from Abcam. All plasmids used in this study are listed in Supplementary Table 1 and will be available on Addgene.

*Antibodies:*

Anti-GFP antibody was purchased from MyBioSource (MBS560494), anti-RFP antibody was purchased from Rockland (600-401-379), anti-human mitochondria antibody was purchased from Abcam (ab92824), anti-GAPDH antibody was purchased from Cell Signaling Technology (5174S)

*Lentiviral Vector Packaging:*

Lentiviral vectors were produced using polyethylenimine (PEI)-based transfection of 293T cells with the plasmids indicated in Supplementary Table 1, along with delta8.2 and VSV-G packaging plasmids in 150-mm cell culture plates. Sodium butyrate (Sigma Aldrich, B5887) was added 8 hours after transfection to achieve a final concentration of 20 mM. Medium was refreshed 24 hours after transfection. 20 mL of virus-containing supernatant was collected 36, 48, and 60 hours after transfection. The three collections were then pooled and concentrated by ultracentrifugation (25,000 rpm for 1.5 hours), resuspended overnight in 100  $\mu$ L PBS, then frozen at -80°C.

### *Generation of Stable Cell Lines*

Parental cells were seeded at 50% confluency in a 6-well plate the day before transduction (day 0). The cell culture medium was replaced with 2 mL fresh medium containing 8  $\mu$ g/mL hexadimethrine bromide (Sigma Aldrich, H9268-5G), 20  $\mu$ L ViralPlus Transduction Enhancer (Applied Biological Materials Inc., G698) and 40  $\mu$ L concentrated lentivirus and cultured overnight (Day 1). The medium was then replaced with complete medium and cultured for another 24 hours (Day 2). Cells were transferred into a 100 mm cell culture dish with appropriate amounts of puromycin (Dose used: 293T: 2  $\mu$ g/mL; 238N1: 3  $\mu$ g/mL; 2985T2: 2  $\mu$ g/mL) and selected for 48 hours (Day 3). After selection, FACS analysis was performed using fluorescent markers indicated in Supplementary Table 2 for validation of selection efficiency.

### *Transwell Co-culture Assay*

The Corning® Transwell® polycarbonate membrane cell culture inserts were purchased from Corning Inc (3422 : CS, Corning, NY). sGFP sender cells were seeded in the upper chamber

inserts of the transwell ( $1 \times 10^5$ /insert). The inserts were then placed back into the plate pre-seeded with  $1 \times 10^5$ /well  $\alpha$ GFP receiver cells and cultured in a humidified incubator at 37 °C, with 5% CO<sub>2</sub> for 24 hours. sGFP sender and  $\alpha$ GFP receiver cells co-cultured in the same plate under the same conditions were used as control. After 24 hours, the upper chamber inserts were removed, cells in the lower chamber were trypsinized and analyzed by flow cytometry.

### *Live and Fixed Cell Imaging*

For live cell microscopy,  $2 \times 10^4$  sGFP sender and  $2 \times 10^4$   $\alpha$ GFP receiver cells were seeded into 35-mm FluoroDish Cell Culture Dishes (World Precision Instruments, FD35-100) and immediately imaged under a DeltaVision OMX (GE Healthcare) microscope with a 60x oil objective lens (Olympus) in a humidified chamber at 37 °C with 5% CO<sub>2</sub>. One image was taken per minute for three hours. Images were collected with a cooled back-thinned EM-CCD camera (Evolve; Photometrics).

For fixed cell microscopy, sender and receiver cells were seeded at the ratios indicated in Supplementary Table 2 with a total number of  $1 \times 10^5$  cells onto Neuvitro coated cover slips (Thermo Fisher Scientific, NC0301187) in a 12-well cell culture plate. 24 hours after co-culture, cells were fixed in 4% paraformaldehyde (PFA) PBS solution at room temperature for 10 minutes and washed with PBS and distilled water three times each, before mounting onto slides using 50% glycerol. Images were captured using a Leica DMI6000B inverted microscope with an 40x oil objective lens. For quantification, GFP-containing receiver cells were counted. Multiple coverslips were analyzed across independent experiments (n=10).

## Western Blot

$5 \times 10^6$  sGFP sender and  $5 \times 10^6$   $\alpha$ GFP receiver cells were co-cultured in a 100mm cell culture dish for 24 hours. Cells were trypsinized, resuspended in FACS buffer containing propidium iodide (PI) (PBS, 2% FBS, 1 mM EDTA, and 1.5  $\mu$ M PI). tdTomato<sup>neg</sup>PI<sup>neg</sup> cells were sorted and lysed in RIPA buffer (50 mM Tris-HCl (pH 7.4), 150 mM NaCl, 1% Nonidet P-40, and 0.1% SDS) and incubated at 4 °C with continuous rotation for 30 minutes, followed by centrifugation at 12,000  $\times$  rcf for 10 minutes. The supernatant was collected, and the protein concentration was determined by BCA assay (Thermo Fisher Scientific, 23250). Protein extracts (20–50  $\mu$ g) were dissolved in 10% SDS-PAGE and transferred onto PVDF membranes. The membranes were blocked with 5% non-fat milk in TBS with 0.1% Tween 20 (TBST) at room temperature for one hour, followed by incubation with primary antibodies diluted in TBST (1:1000 for anti-GFP, anti-Tomato (RFP) and anti-human mitochondria (hu-Mito), 1:5000 for anti-GAPDH) at 4 °C overnight. After three 10-minutes washes with TBST, the membranes were incubated with the appropriate secondary antibody conjugated to HRP diluted in TBST (1:10000) at room temperature for 1 hour. After three 10-minutes washes with TBST, Protein expression was quantified with enhanced chemiluminescence reagents (Fisher Scientific, PI80196).

## GFP/AF660 Stability

To assess the stability of GFP and AF660 in touched receiver cells,  $1 \times 10^7$  sGFP or sHalo-GFP sender cells were co-cultured with  $1 \times 10^7$   $\alpha$ GFP receiver cells in a 150mm cell culture dish for 6 hours. Cells were then trypsinized and resuspended in FACS buffer containing propidium iodide. mCherry<sup>neg</sup>PI<sup>neg</sup>BFP<sup>pos</sup> cells were sorted and  $1 \times 10^5$  cells were re-plated in 12-well plate and cultured for 2, 4, 6, 8, 12, 24 and 48 hours in DMEM containing 10% FBS, 100 units/mL

penicillin and 100 µg/mL streptomycin. GFP or AF660 intensity was assessed via FACS analysis of mCherry<sup>neg</sup>PI<sup>neg</sup>BFP<sup>pos</sup> cells and shown as Mean +/- SD of GFP/AF660 MFI in triplicate cultures.

#### *Puromycin Resistant Protein Transfer Assay*

To validate puromycin resistant protein (GCN5-Related N-Acetyltransferases, PuroR) function in sender cells, 5×10<sup>6</sup> HEK-293T cells were transfected with sGFP-PuroR-PDGFR, sGFP-PDGFR or sGFP-PDGFR-IRES-PuroR in a 100-mm cell culture dish for 12 hours before replating into a 12-well plate (1×10<sup>5</sup> cells/well). 24 hours after transfection, cells were treated with 1, 2 or 5 µg/mL puromycin for 24 hours. To count the number of viable receiver cells co-cultured with sGFP-PuroR sender cells, 2×10<sup>5</sup> αGFP receiver cells were co-cultured with 8×10<sup>5</sup> sGFP or sGFP-PuroR sender cells in a 6-well plate. 24 hours after co-culture, cells were treated with 0, 1, 3 µg/mL puromycin for 48 hours. Viable tdTomato<sup>neg</sup>PI<sup>neg</sup>BFP<sup>pos</sup> receiver cells were counted via FACS.

#### *Primary Mouse Cell Isolation*

Mouse (C57BL/6J, The Jackson Laboratory) lung, kidney, heart, hindlimb skeleton muscle, spleen and liver tissue were dissected, cut into small pieces and digested in 5 mL tissue digest media (3.5 mL HBSS-Ca<sup>2+</sup> free, 0.5 mL Trypsin-EDTA (0.25%), 5mg Collagenase IV (Worthington), 25 U Dispase (Corning) for 30 minutes in hybridization chamber at 37°C with rotation. Digestion is then neutralized by adding 5 mL ice cold Quench Solution (4.5 mL L15 media, 0.5 mL FBS, 94 µg DNase). Single cell suspensions were generated by filtering through a 40µM cell strainer, spinning down at 500 rcf for 5 minutes and washed with PBS twice

For primary mouse lung epithelial cells, kidney epithelial cells and cardiomyocyte isolation and culture, the single cell pellets were resuspended in 1mL FACS buffer containing 1:300 dilution of anti-EpCam-AF467 (Biolegend, 118211) (for lung and kidney epithelial cell ) or anti-Sirpa-AF467 (Biolegend, 144027) (for cardiomyocyte) antibody and incubated on ice for 20 minutes before FACS sorting. DAPI<sup>neg</sup>EpCam<sup>pos</sup> or DAPI<sup>neg</sup>Sirpa<sup>pos</sup> cells were sorted and seeded onto a 100 mm culture dish precoated with 5 µg/cm<sup>2</sup> Bovine Plasma Fibronectin (ScienCell, 8248). For primary skeleton muscle cell, splenocyte and hepatocyte culture, the single cell pellets were resuspended in DMEM containing 20% FBS, 200 units/mL penicillin and 200 µg/mL streptomycin, amphotericin and cultured in 100-mm culture dish at 37°C for 1 hour to remove fibroblast cells. The supernatant containing primary skeletal muscle cells, splenocytes and hepatocytes was then transferred into a new 100-mm culture dish precoated with 5 µg/cm<sup>2</sup> Bovine Plasma Fibronectin (ScienCell, 8248).

# *Conjugation of HaloTag Ligand to Oligonucleotides*

Oligonucleotides to be conjugated with the HaloTag ligand were synthesized with a 5' C12-linked amine and a 3' biotin group (IDT). Oligonucleotides were initially ethanol-precipitated and subsequently resuspended to 1 mM in conjugation buffer (100 mM Na<sub>2</sub>HPO<sub>4</sub> (Sigma-Aldrich S9763), 150 mM NaCl (Thermo Fisher Scientific S271), pH 8.5). Resuspended oligos were combined with an equal volume of the HaloTag ligand succinimidyl ester (O4) (Promega P6751) resuspended in N,N- dimethylformamide (Sigma-Aldrich D4551) with a 30-fold molar excess of the ligand. Conjugation reactions were conducted overnight at room temperature with constant agitation prior to final cleanup via ethanol precipitation.



## *Loading of HaloTag-Expressing Sender Cells*

Prior to loading with HaloTag-conjugated elements, sender cells were washed once in cold PBS following detachment and subsequently resuspended in cold Cell Staining Buffer (BioLegend 42021). For loading of HaloTag-conjugated fluorophores, senders were stained at a density of  $1.00\text{E}+07$  cells/mL on ice for five minutes in the presence of either  $1\text{ }\mu\text{M}$  HaloTag-Alexa Fluor 488 (Promega G1001) or  $3.5\text{ }\mu\text{M}$  HaloTag-Alexa Fluor 660 (Promega G8471). Stained sender cells were then washed twice in Cell Staining Buffer (500 rcf for 5 min at  $4^{\circ}\text{C}$ ) prior to resuspension in growth media in preparation for co-culture.

For loading with HaloTag-conjugated oligonucleotides, sender cells were initially resuspended and incubated with  $100\text{ }\mu\text{g/mL}$  salmon sperm DNA (Thermo Fisher Scientific 15632011).

Sender cells were then incubated with  $3.5\text{ }\mu\text{M}$  HaloTag-conjugated oligonucleotides (5AmMC12/TCTAGGCGCCCGGAATTAGAT/3Bio) and subsequently washed once.

Oligonucleotide-loaded sender cells were then stained with  $5\text{ }\mu\text{g/mL}$  streptavidin-conjugated Alexa Fluor 647 (Thermo Fisher Scientific S32357) for 30 minutes on ice. The loaded, stained senders were then washed twice and resuspended in growth media in preparation for co-culture.

## *3D-microfluidic cancer cell-endothelial cell co-culture*

The master mold of microfluidic chips was fabricated using a 3D printer (Titan HD, Kudo3D Inc. Dublin, CA). The surface of the molds was spray-coated with silicone mold release (CRC, cat. No.: 03300) and PDMS (poly-dimethyl siloxane, Sylgard 182, Dow Corning) was poured on it. After heat curing at  $65^{\circ}\text{C}$  for approximately 5 [hours](#), the solidified PDMS replica was peeled off from the mold. Holes were made at both ends of each channel in the PDMS replica using a biopsy punch. The PDMS replica was then bonded to precleaned microscope glass slides (Fisher

Scientific) through plasma treatment (Harrick Plasma PDC-32G, Ithaca, NY). Microfluidic chips were UV-treated overnight for sterilization before cell seeding.

A basement membrane extract (BME) hydrogel (Cultrex™ reduced growth factor basement membrane matrix type R1, Trevigen, Cat #: 3433-001-R1) was injected into the middle hydrogel channel of the chips placed on a cold pack and then transferred to rectangular 4-well cell culture plates (Thermo Scientific, Cat #: 267061) followed by incubation at 37°C in a cell culture incubator for 30 minutes for gelation. After gelation, 10 uL of human umbilical vein endothelial cells(HUVECs) resuspended at the density of  $\sim 1 \times 10^6$  cells/mL was injected to the blood channel of the chips and endothelial cell growth medium was added to the other side channel. After incubation for 3h for cells to adhere, old medium in both side channels was replaced with fresh medium. The next day, samples were placed on a rocking see-saw shaker (OrganoFlow® L, Mimetas) that generates a pulsatile bidirectional flow to mimic the dynamic native environment and cultured for 4 more days to form a complete endothelium. Cell culture medium was changed every other day. Then, medium in the blood channel of the chips was removed and 10 uL of sGFP-expressing lung adenocarcinoma cell at the density of  $\sim 1 \times 10^5$  cells/mL was injected and cultured for 24 [hours](#) before imaging. Images were captured using an EVOS fl auto imaging system (Life Technologies).

### *Primary Neuron and Astrocyte Cultures*

Primary cortical neurons were dissociated from mouse (C57BL/6J, The Jackson Laboratory) E16.5 embryonic cortices into single cell suspensions with a papain dissociation system (Worthington Biochemical Corporation). Tissue culture plates were coated with poly-L-lysine (0.1% w/v) before seeding cells. Neurons were grown in Neurobasal media (Gibco)

supplemented with B-27 serum free supplement (Gibco), GlutaMAX (Gibco), and penicillin-streptomycin (Gibco) in a humidified incubator at 37 °C, with 5% CO<sub>2</sub>. Half media changes were performed every 4-5 days. Primary astrocytes were dissociated from P0-P1 mouse cortices using the same papain dissociation methods as neurons, except the single cell suspensions were then plated onto tissue culture plates without poly-L-lysine in DMEM with 10% FBS and penicillin-streptomycin. Primary astrocyte cultures were passaged using Accutase (Stemcell Technologies).

### *Primary Human T Cell Cultures*

Blood from healthy donors collected in leukoreduction system (LRS) chambers was separated by Ficoll-Paque density gradient to obtain peripheral blood mononuclear cells (PBMCs). CD4<sup>pos</sup> and CD8<sup>pos</sup> T cells were isolated by negative selection using EasySep Human CD4+ T Cell Isolation Kit and EasySep Human CD8+ T Cell Isolation Kit (STEMCELL Technologies), respectively, according to the manufacturer's instructions. T cells were cultured for 3 days with CD3/CD28 Dynabeads (ThermoFisher Scientific) with 40 IU/mL IL-2 and spinoculated with lentivirus for 2 hours at 400 rcf in the presence of 8 µg/mL polybrene. T cells were expanded following transduction for two days in the presence of CD3/CD28 Dynabeads and 300 IU/mL IL-2 prior to use in assays. Transduced or untransduced CD4<sup>pos</sup> or CD8<sup>pos</sup> T cells were co-cultured for 24 hours together with A549 cells. Following co-culture, cells were harvested, stained with antibodies against CD45, CD4, or CD8 (BioLegend) and analyzed on a LSRI Fortessa flow cytometer (BD Biosciences). Each condition was run in triplicate, and two independent experiments were conducted using T cells from different donors. For microscopy,

A549 cells were co-cultured with CD4<sup>pos</sup> T cells in glass-bottom plates (MatTek Corporation) and imaged on an LSM 700 confocal microscope (Zeiss).

## REFERENCES

- Bendas, G., and Borsig, L. (2012). Cancer cell adhesion and metastasis: selectins, integrins, and the inhibitory potential of heparins. *International journal of cell biology* 2012.
- Boisset, J.-C., Vivié, J., Grün, D., Muraro, M.J., Lyubimova, A., and Van Oudenaarden, A. (2018). Mapping the physical network of cellular interactions. *Nature methods* 15, 547-553.
- Crespo, J., Sun, H., Welling, T.H., Tian, Z., and Zou, W. (2013). T cell anergy, exhaustion, senescence, and stemness in the tumor microenvironment. *Current opinion in immunology* 25, 214-221.
- Deb, A. (2014). Cell–cell interaction in the heart via Wnt/ $\beta$ -catenin pathway after cardiac injury. *Cardiovascular research* 102, 214-223.
- Dittmer, J., and Leyh, B. (2014). Paracrine effects of stem cells in wound healing and cancer progression. *International journal of oncology* 44, 1789-1798.
- Dustin, M.L., and Choudhuri, K. (2016). Signaling and polarized communication across the T cell immunological synapse. *Annual review of cell and developmental biology* 32, 303-325.
- Fridy, P.C., Li, Y., Keegan, S., Thompson, M.K., Nudelman, I., Scheid, J.F., Oeffinger, M., Nussenzweig, M.C., Fenyö, D., and Chait, B.T. (2014). A robust pipeline for rapid production of versatile nanobody repertoires. *Nature methods* 11, 1253.
- Giladi, A., Cohen, M., Medaglia, C., Baran, Y., Li, B., Zada, M., Bost, P., Blecher-Gonen, R., Salame, T.-M., and Mayer, J.U. (2020). Dissecting cellular crosstalk by sequencing physically interacting cells. *Nature Biotechnology*, 1-9.
- Halpern, K.B., Shenhav, R., Massalha, H., Toth, B., Egozi, A., Massasa, E.E., Medgalia, C., David, E., Giladi, A., and Moor, A.E. (2018). Paired-cell sequencing enables spatial gene expression mapping of liver endothelial cells. *Nature biotechnology* 36, 962-970.
- Joyce, J.A., and Fearon, D.T. (2015). T cell exclusion, immune privilege, and the tumor microenvironment. *Science* 348, 74-80.
- Kitadai, Y. (2010). Cancer-stromal cell interaction and tumor angiogenesis in gastric cancer. *Cancer Microenvironment* 3, 109-116.
- Komohara, Y., and Takeya, M. (2017). CAFs and TAMs: maestros of the tumour microenvironment. *The Journal of pathology* 241, 313-315.
- Konry, T., Sarkar, S., Sabhachandani, P., and Cohen, N. (2016). Innovative tools and technology for analysis of single cells and cell–cell interaction. *Annual review of biomedical engineering* 18, 259-284.
- Kota, J., Hancock, J., Kwon, J., and Korc, M. (2017). Pancreatic cancer: Stroma and its current and emerging targeted therapies. *Cancer letters* 391, 38-49.

836 Langridge, P.D., and Struhl, G. (2017). Epsin-dependent ligand endocytosis activates Notch by  
837 force. *Cell* 171, 1383-1396. e1312.

838 Li, G., Bethune, M.T., Wong, S., Joglekar, A.V., Leonard, M.T., Wang, J.K., Kim, J.T., Cheng, D.,  
839 Peng, S., and Zaretsky, J.M. (2019). T cell antigen discovery via trogocytosis. *Nature methods* 16,  
840 183.

841 Lim, K.H., Huang, H., Pralle, A., and Park, S. (2013). Stable, high-affinity streptavidin monomer  
842 for protein labeling and monovalent biotin detection. *Biotechnology and bioengineering* 110,  
843 57-67.

844 Los, G.V., Encell, L.P., McDougall, M.G., Hartzell, D.D., Karassina, N., Zimprich, C., Wood, M.G.,  
845 Learish, R., Ohana, R.F., and Urh, M. (2008). HaloTag: a novel protein labeling technology for  
846 cell imaging and protein analysis. *ACS chemical biology* 3, 373-382.

847 Meurette, O., and Mehlen, P. (2018). Notch signaling in the tumor microenvironment. *Cancer*  
848 *Cell* 34, 536-548.

849 Morsut, L., Roybal, K.T., Xiong, X., Gordley, R.M., Coyle, S.M., Thomson, M., and Lim, W.A.  
850 (2016). Engineering customized cell sensing and response behaviors using synthetic notch  
851 receptors. *Cell* 164, 780-791.

852 Nagarsheth, N., Wicha, M.S., and Zou, W. (2017). Chemokines in the cancer microenvironment  
853 and their relevance in cancer immunotherapy. *Nature Reviews Immunology* 17, 559.

854 Nielsen, M.F.B., Mortensen, M.B., and Detlefsen, S. (2016). Key players in pancreatic cancer-  
855 stroma interaction: Cancer-associated fibroblasts, endothelial and inflammatory cells. *World*  
856 *journal of gastroenterology* 22, 2678.

857 Orimo, A., and Weinberg, R.A. (2006). Stromal fibroblasts in cancer: a novel tumor-promoting  
858 cell type. *Cell cycle* 5, 1597-1601.

859 Ovcinnikovs, V., Ross, E.M., Petersone, L., Edner, N.M., Heuts, F., Ntavli, E., Kogimtzis, A.,  
860 Kennedy, A., Wang, C.J., and Bennett, C.L. (2019). CTLA-4-mediated transendocytosis of  
861 costimulatory molecules primarily targets migratory dendritic cells. *Science immunology* 4,  
862 eaaw0902.

863 Pasqual, G., Chudnovskiy, A., Tas, J.M., Agudelo, M., Schweitzer, L.D., Cui, A., Hacohen, N., and  
864 Vitorica, G.D. (2018). Monitoring T cell-dendritic cell interactions in vivo by intercellular  
865 enzymatic labelling. *Nature* 553, 496.

866 Swartz, M.A., Iida, N., Roberts, E.W., Sangaletti, S., Wong, M.H., Yull, F.E., Coussens, L.M., and  
867 DeClerck, Y.A. (2012). Tumor microenvironment complexity: emerging roles in cancer therapy  
868 (AACR).

869 Tanenbaum, M.E., Gilbert, L.A., Qi, L.S., Weissman, J.S., and Vale, R.D. (2014). A protein-tagging  
870 system for signal amplification in gene expression and fluorescence imaging. *Cell* 159, 635-646.

871 Tsioris, K., Torres, A.J., Douce, T.B., and Love, J.C. (2014). A new toolbox for assessing single  
872 cells. *Annual review of chemical and biomolecular engineering* 5, 455-477.

873 Venkatesh, H.S., Morishita, W., Geraghty, A.C., Silverbush, D., Gillespie, S.M., Arzt, M., Tam, L.T.,  
874 Espenel, C., Ponnuswami, A., and Ni, L. (2019). Electrical and synaptic integration of glioma into  
875 neural circuits. *Nature* 573, 539-545.

876 Yaron, A., and Sprinzak, D. (2012). The cis side of juxtacrine signaling: a new role in the  
877 development of the nervous system. *Trends in neurosciences* 35, 230-239.

878 Zeng, Q., Michael, I.P., Zhang, P., Saghafeina, S., Knott, G., Jiao, W., McCabe, B.D., Galván, J.A.,  
 879 Robinson, H.P., and Zlobec, I. (2019). Synaptic proximity enables NMDAR signalling to promote  
 880 brain metastasis. *Nature* 573, 526-531.  
 881 Zhang, Y., and Liu, F. (2019). Multidimensional Single-Cell Analyses in Organ Development and  
 882 Maintenance. *Trends in cell biology*.  
 883

Tang *et al.*

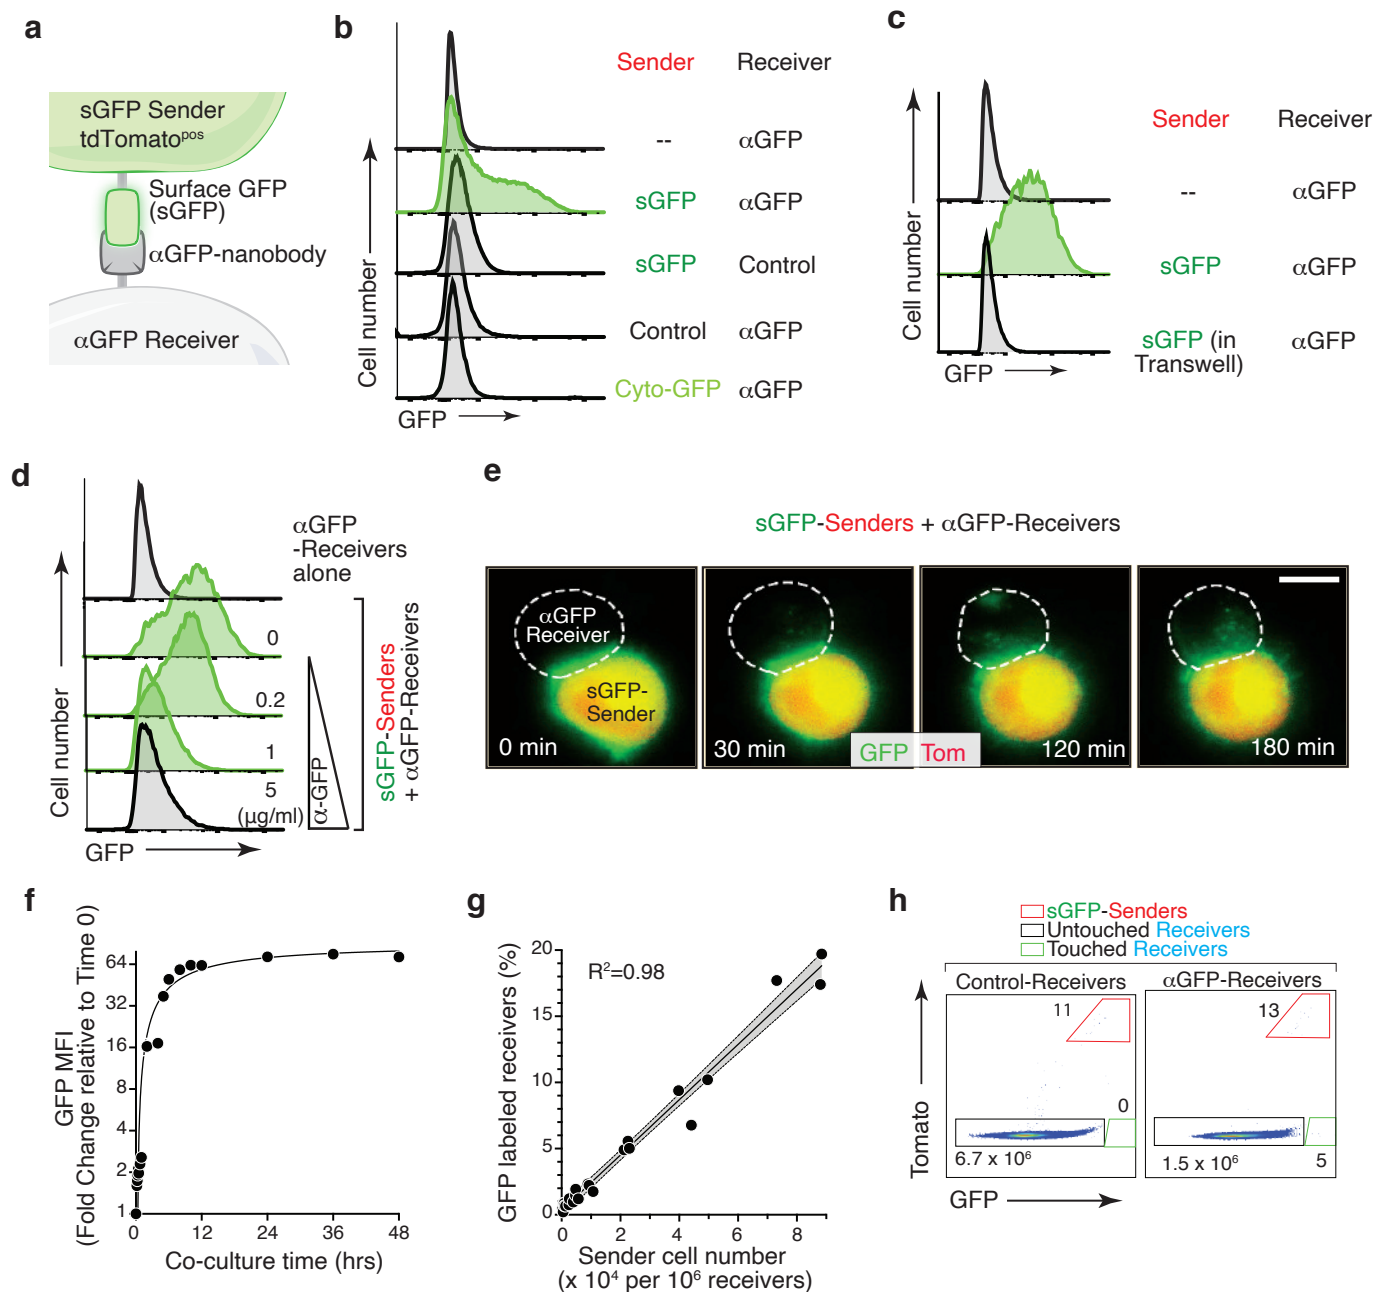

**Figure 1. GFP-based Touching Nexus (G-baToN) leads to cell-cell interaction-dependent receiver cell labeling**

**a.** Schematic of the G-baToN system. Surface GFP (sGFP) on a sender cell is transferred to a receiver cell expressing a cell surface anti-GFP nanobody (αGFP) leading to GFP labeling of the “touched” receiver.

**b.** GFP transfer from sGFP-expressing KPT lung cancer sender cells (marked by intracellular tdTomato) to αGFP-expressing 293 receiver cells. Receiver cell labeling is sGFP- and αGFP- dependent. Control sender cells do not express sGFP. Control receiver cells do not express αGFP. Cytoplasmic GFP (Cyto-GFP) is not transferred to receiver cells. Sender and receiver cells were seeded at a 1:1 ratio and co-cultured for 24 hours. Receivers were defined as Tomato<sup>neg</sup>PI<sup>neg</sup> cells.

**c.** GFP transfer to 293 receiver cells requires direct cell-cell contact. Receiver cells separated from sender cells by a transwell chamber are not labeled. Sender and receiver cells were seeded in upper and lower chambers respectively at a 1:1 ratio and cultured for 24 hours. Receivers were defined as Tomato<sup>neg</sup>PI<sup>neg</sup> cells.

**d.** GFP transfer to 293 receiver cells requires sGFP-αGFP interaction and is blocked by anti-GFP antibody in a dose-dependent manner. sGFP sender cells were pre-incubated with the indicated concentration of anti-GFP antibody for 2 hours, washed with PBS, and then co-cultured with receiver cells at a 1:1 ratio for 24 hours. Receivers were defined as Tomato<sup>neg</sup>PI<sup>neg</sup> cells.

**e.** Time-lapse imaging of GFP transfer from a sGFP-expressing sender cell to an αGFP-expressing receiver cell. Time after contact is indicated. Receiver cell is outlined with white dashed line. Scale bar: 10 μm.

**f.** Analysis of GFP Mean Fluorescence Intensity (MFI) of αGFP receiver cells (marked by intracellular BFP) co-cultured with sGFP sender cells (marked by intracellular tdTomato) co-cultured for the indicated amount of time. Sender and receiver cells were seeded at a 1:1 ratio. Receivers were defined as Tomato<sup>neg</sup>PI<sup>neg</sup>BFP<sup>pos</sup> cells.

**g.** Percentage of labeled αGFP receiver cells after co-culture with different numbers of sender cells for 24 hours. Receivers were defined as Tomato<sup>neg</sup>PI<sup>neg</sup>BFP<sup>pos</sup> cells.

**h.** Detection of rare labeled αGFP receiver cells after co-culture with sGFP sender cells at approximately a 1:10<sup>5</sup> ratio for 24 hours. Receivers were defined as Tomato<sup>neg</sup>PI<sup>neg</sup>BFP<sup>pos</sup> cells.



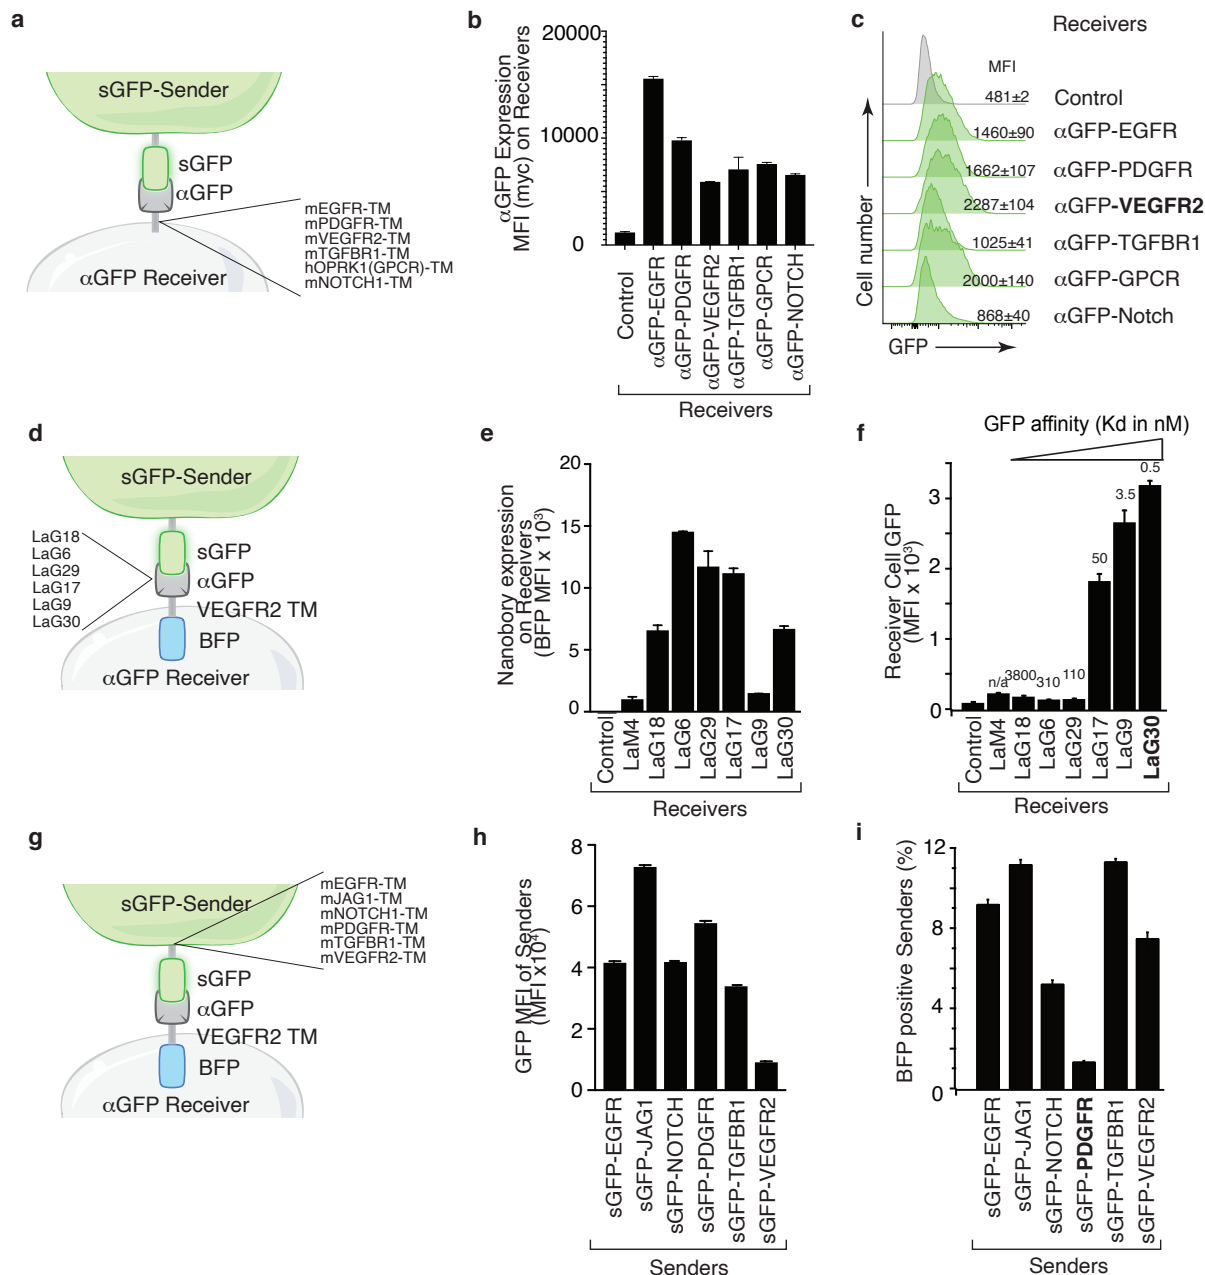

**Figure 2. Transmembrane domains and the nanobody affinity impact sGFP transfer and receiver cell labeling.**

**a.** Schematic of the sender and receiver cells used to determine the impact of different αGFP transmembrane (TM) domains. TM domains contain the TM domain itself as well as membrane proximal regions from the indicated mouse (m) and human (h) proteins.

**b.** Different TM domains impact cell surface αGFP expression on 293 receiver cells. Membrane αGFP was accessed by anti-Myc staining. Control receiver cells do not express any nanobody. Mean  $\pm$  SD of Myc MFI in triplicate cultures is shown.

**c.** VEGFR2 TM domain on αGFP receivers enables highest GFP transfer efficiency. Receiver cells expressing αGFP linked by different TM domains were co-cultured with sGFP sender cells at a 1:1 ratio for 6 hours. Receivers were defined as Tomato<sup>neg</sup>PI<sup>neg</sup> cells.

**d.** Schematic of the sender and receiver cells used to determine the impact of different αGFP nanobodies on G-baTon-based labeling.

**e.** Different nanobodies exhibit different levels of expression on 293 receiver cells. Total αGFP expression was assessed by BFP intensity. Mean  $\pm$  SD of GFP MFI in triplicate cultures is shown.

**f.** αGFP affinity influences transfer of GFP to touched 293 receiver cells. Receiver cells expressing different αGFP nanobodies were co-cultured with sGFP sender cells at a 1:1 ratio for 6 hours. GFP transfer was assessed by flow cytometry. GFP intensity on Tomato<sup>neg</sup>PI<sup>neg</sup>BFP<sup>pos</sup> receiver cells is shown as mean  $\pm$  SD of triplicate cultures.

**g.** Schematic of the sender and receiver cells used to determine the impact of different sGFP TM domains on G-baTon-based labeling. TM domains contain the TM domain itself as well as membrane proximal regions from the indicated mouse (m) and human (h) proteins.

**h.** Different TM domains on sGFP impact its expression in 293 sender cells. sGFP expression in sender cells was assessed by flow cytometry for GFP. Mean  $\pm$  SD of GFP MFI in triplicate cultures is shown.

**i.** PDGFR TM domain on sGFP minimized retrograde transfer of αGFP from receiver cells to 293 sGFP sender cells. αGFP transfer to sGFP senders were determined as the percentage of mCherry<sup>pos</sup>GFP<sup>pos</sup> sender cells that were also BFP<sup>pos</sup>. Cells were co-cultured for 6 hours at a 1:1 ratio. Mean  $\pm$  SD of triplicate cultures is shown.



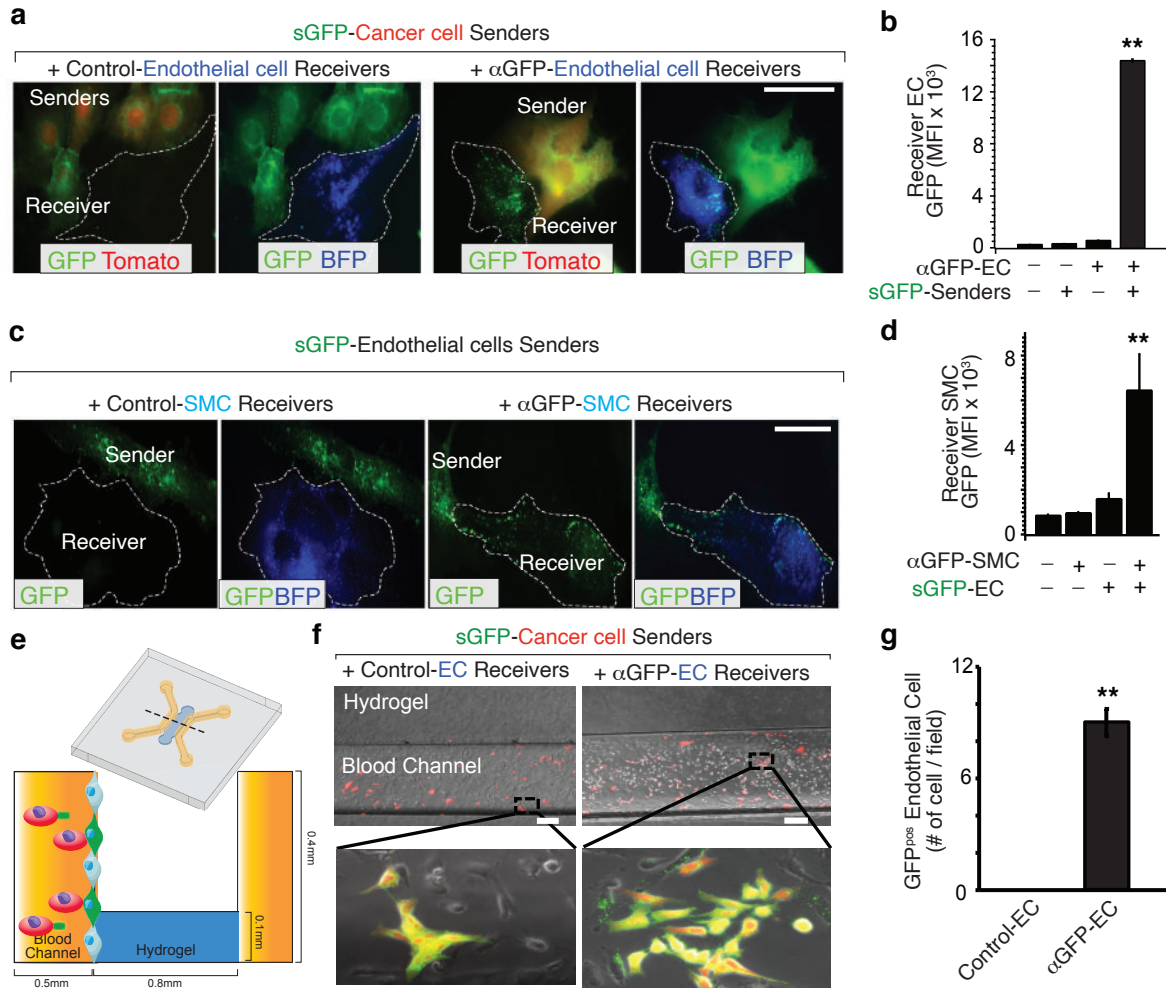

**Figure 3. G-baToN can be used for touching-based labeling between cancer cells and endothelial cells.**

**a, b.** G-baToN can detect cancer cell-endothelial cell (EC) interactions. HUVECs expressing  $\alpha$ GFP were co-cultured with or without Tomato<sup>pos</sup> sGFP-expressing lung cancer sender cells at a 1:1 ratio for 24 hours. **(a)** Representative images of Tomato<sup>pos</sup> sGFP-expressing lung cancer sender cells co-cultured with either control HUVEC receiver cells (HUVECs expressing BFP) or  $\alpha$ GFP HUVEC receiver cells at a 1:1 ratio for 24 hours. Scale bars = 50  $\mu$ m. **(b)** MFI of GFP on PI<sup>neg</sup>Tomato<sup>neg</sup>BFP<sup>pos</sup>CD31<sup>pos</sup> Receiver cells was assessed by flow cytometry and is shown as mean  $\pm$  SD of triplicate cultures. \*\*  $p < 0.01$ ,  $n = 3$ .

**c, d.** G-baToN can detect endothelial cell (EC)-smooth muscle cell (SMC) interactions. Primary human umbilical artery smooth muscle cells (HUASMC) expressing  $\alpha$ GFP were co-cultured with or without sGFP-expressing HUVEC sender cells at a 1:1 ratio for 24 hours. **(c)** Representative images of sGFP-expressing HUVEC sender cells co-cultured with either control HUASMC receiver cells (expressing BFP) or  $\alpha$ GFP HUASMC receiver cells at a 1:1 ratio for 24 hours. Scale bars = 50  $\mu$ m. **(d)** MFI of GFP on PI<sup>neg</sup>BFP<sup>pos</sup> receiver cells was assessed by flow cytometry and is shown as mean  $\pm$  SD of triplicate cultures. \*\*  $p < 0.01$ ,  $n = 3$ .

**e, f, g.** G-baToN can detect cancer cell-endothelial cell (EC) interactions in 3D-microfluidic culture. **(e)** Details on design of 3D-microfluidic devices for cancer cell-endothelial cell co-culture. **(f)** Representative images of Tomato<sup>pos</sup> sGFP-expressing lung cancer sender cells co-cultured with either control HUVEC receiver cells (HUVECs expressing BFP) or  $\alpha$ GFP HUVEC receiver cells at a 1:10 ratio for 24 hours. Scale bars = 200  $\mu$ m. **(g)** Average number of GFP<sup>pos</sup> HUVEC after co-culture with cancer cells for 24 h. 10 areas from three chips with 200X magnification were used for the quantification. \*\*  $p < 0.01$ ,  $n = 10$ .

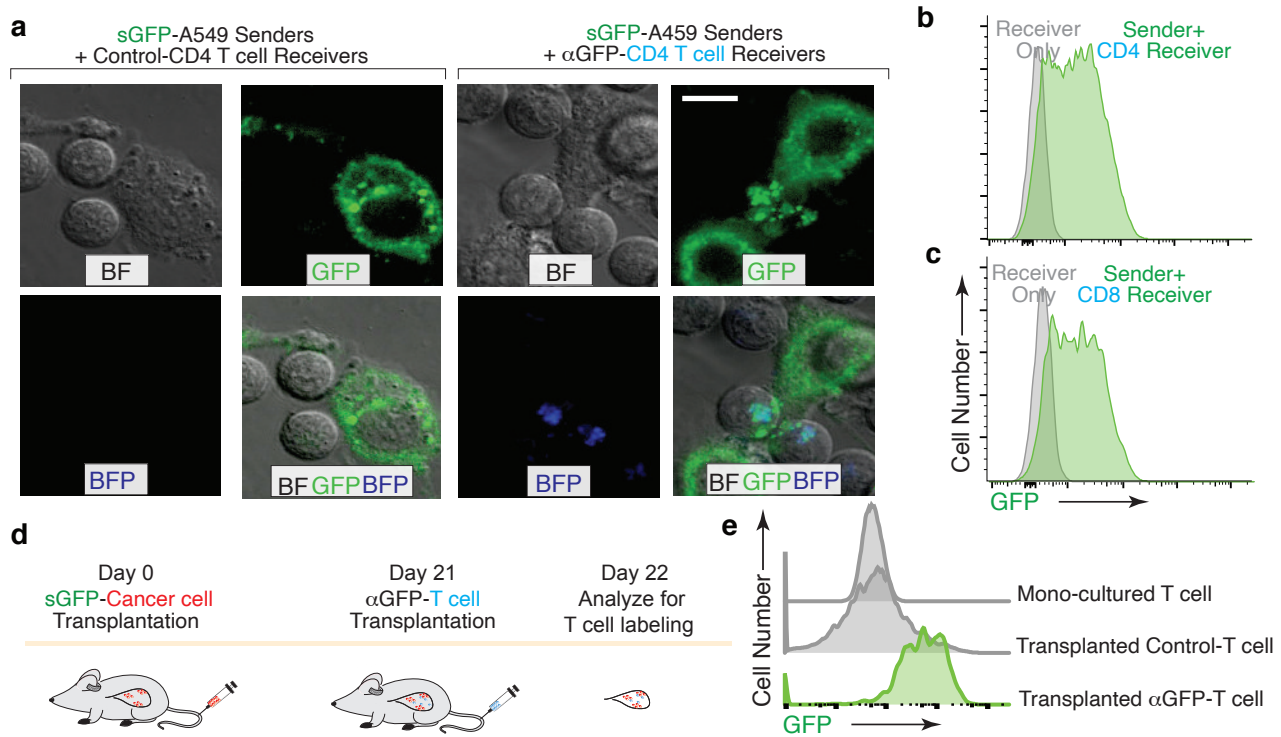

**Figure 4. G-baToN can detect T cells-cancer cells interactions.**

**a,b,c.** G-baToN can detect cancer cell-T cell interactions *in vitro*. **(a)** Primary human CD4<sup>pos</sup> or CD8<sup>pos</sup> T cells were co-cultured with sGFP-expressing lung cancer sender cells (A549 cells) at a 2:1 ratio for 24 hours. Representative image of A549 cell and CD4 T cell interactions. Scale bars = 10  $\mu$  m. **(b,c)** A549 cells expressing sGFP can transfer GFP to  $\alpha$ GFP primary human CD4<sup>pos</sup> **(b)** or CD8<sup>pos</sup> **(c)** T cells after co-culture at a 1:1 ratio for 24 hours. Receivers were defined as Near-IR<sup>neg</sup>BFP<sup>pos</sup>CD4<sup>pos</sup>/CD8<sup>pos</sup> T cells.

**d,e.** G-baToN can detect cancer cell-T cell interactions *in vivo*. **(d)** Experiment design for cancer cell-T cell interactions *in vivo*.  $1 \times 10^6$  sGFP-expressing lung cancer sender cells were transplanted into NSG mice at day 0.  $4 \times 10^6$   $\alpha$ GFP primary human CD4<sup>pos</sup> T cell were transplanted into tumor-bearing mice at day 21. 1 day after T cell transplantation (day 22), T cells in mouse lung were analyzed via FACS. **(e)** sGFP-expressing cancer cell can transfer GFP to  $\alpha$ GFP-expressing primary human CD4<sup>pos</sup> T cells. Receives were defined as PI<sup>neg</sup>BFP<sup>pos</sup>CD4<sup>pos</sup> T cells.

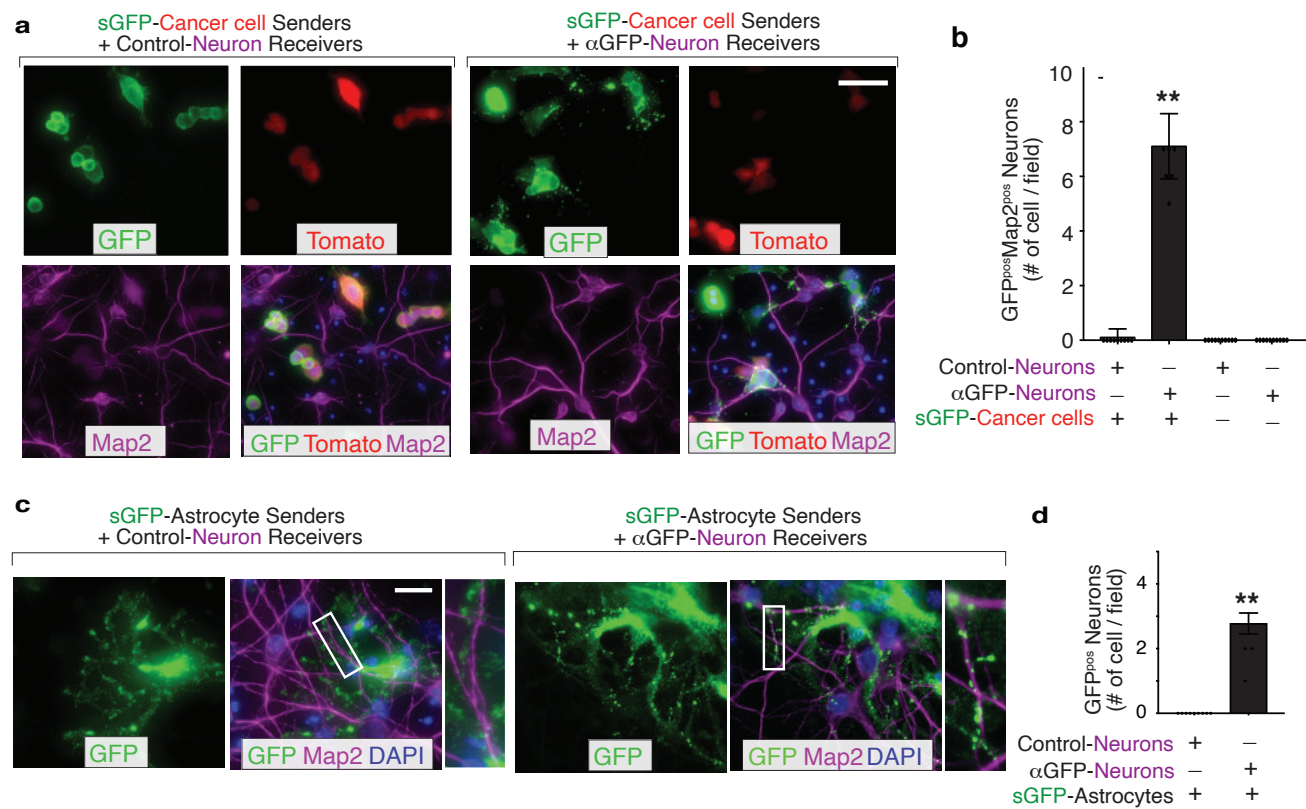

**Figure 5. G-baToN can detect neuron-cancer cell, neuron-astrocyte interactions.**

**a.** Representative image of sGFP-expressing cancer sender cells co-cultured with either control neuron receivers or  $\alpha$ GFP neuron receivers at a 1:1 ratio for 24 hours. Neurons were stained with Microtubule Associated Protein 2 (Map2). Scale bars = 50  $\mu$ m.

**b.** Quantification of supplementary Figure 5a using images from 10 different fields. Each dot represents a field. The bar indicates the mean  $\pm$  SD. GFP<sup>pos</sup> neurons were defined as Map2<sup>pos</sup>tdTomato<sup>neg</sup> cells with GFP. \*\*  $p < 0.01$ ,  $n = 10$ .

**c.** Representative images of sGFP-expressing astrocyte sender cells co-cultured with either control neuron receivers or  $\alpha$ GFP neuron receivers at a 1:2 ratio for 24 hours. Neurons were stained with Map2. Scale bars = 50  $\mu$ m. Higher magnification of the boxed areas are shown on the right.

**d.** Quantification of Figure 5c using images from 10 different fields. Each dot represents a field. The bar indicates the mean  $\pm$  SD. GFP<sup>pos</sup> neurons were defined as Map2<sup>pos</sup> cells with GFP. \*\*  $p < 0.01$ ,  $n = 10$ .

Tang *et al.*

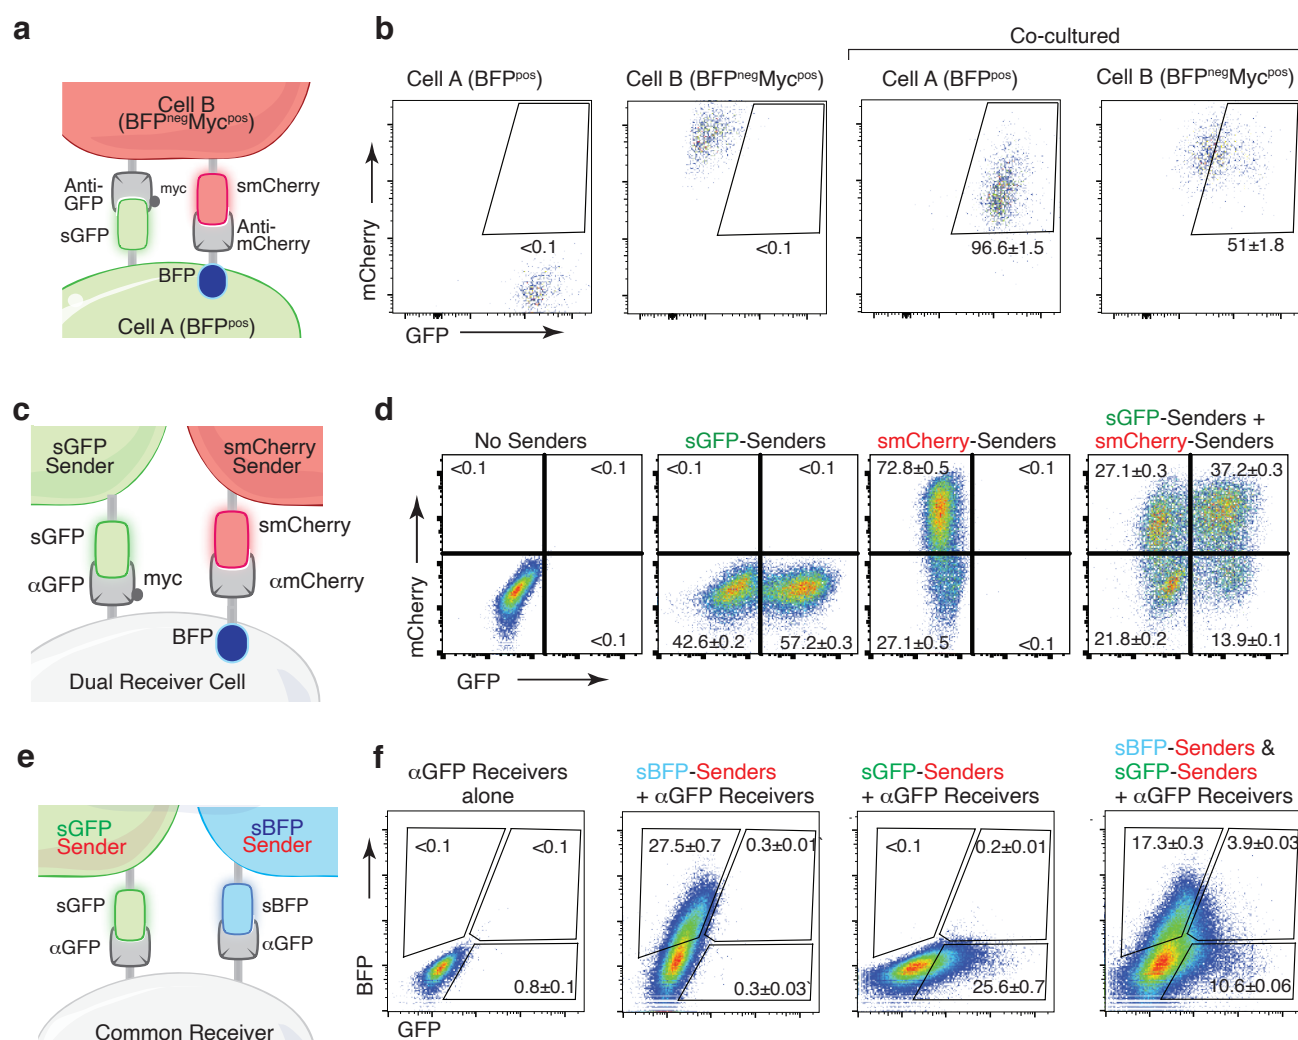

**Figure 6. Multicolor-baToN systems enable recording of higher order interactions.**

**a.** Diagram of the Reciprocal-baToN system. Cell A expresses sGFP and amCherry (tagged by intracellular BFP), Cell B expresses smCherry and αGFP (tagged by Myc-tag).

**b.** Representative FACS plots of cell A and cell B monocultures (left 2 panels) and after co-culture at a 5:1 ratio for 24 hours. Percent of labeled cells is indicated as mean +/- SD of triplicate cultures.

**c.** Schematic of the AND gate-baToN system. sGFP and smCherry sender cells express either sGFP or mCherry. Dual receiver cells express both αGFP (LaG17, tagged by Myc-tag) and amCherry (LaM4, tagged by intracellular BFP).

**d.** Representative FACS plots of dual receiver 293 cells cultured with the indicated 293 sender cells at 1:1 (for single sender cell) or 1:1:1 (for dual sender cells) ratios. Percent of labeled receiver cells (gated as BFP<sup>pos</sup>) after 24 hours of co-culture is indicated as mean +/- SD of triplicate cultures.

**e.** Diagram of the BFP/GFP AND gate-baToN system. sBFP sender cells express intracellular Tomato and surface BFP, sGFP sender cells express intracellular Tomato and surface GFP. Common receiver cells expressed αGFP.

**f.** Representative FACS plots of common receiver 293 cells cultured with the indicated Tomato<sup>pos</sup> sender cells at 1:1 (for single sender cell) or 1:1:1 (for dual sender cells) ratios. Receiver cells were gated as Tomato<sup>neg</sup>PI<sup>neg</sup>. Percent of labeled common receiver cells after 24 hours of co-culture is indicated as mean +/- SD of triplicate cultures.

Tang et al.

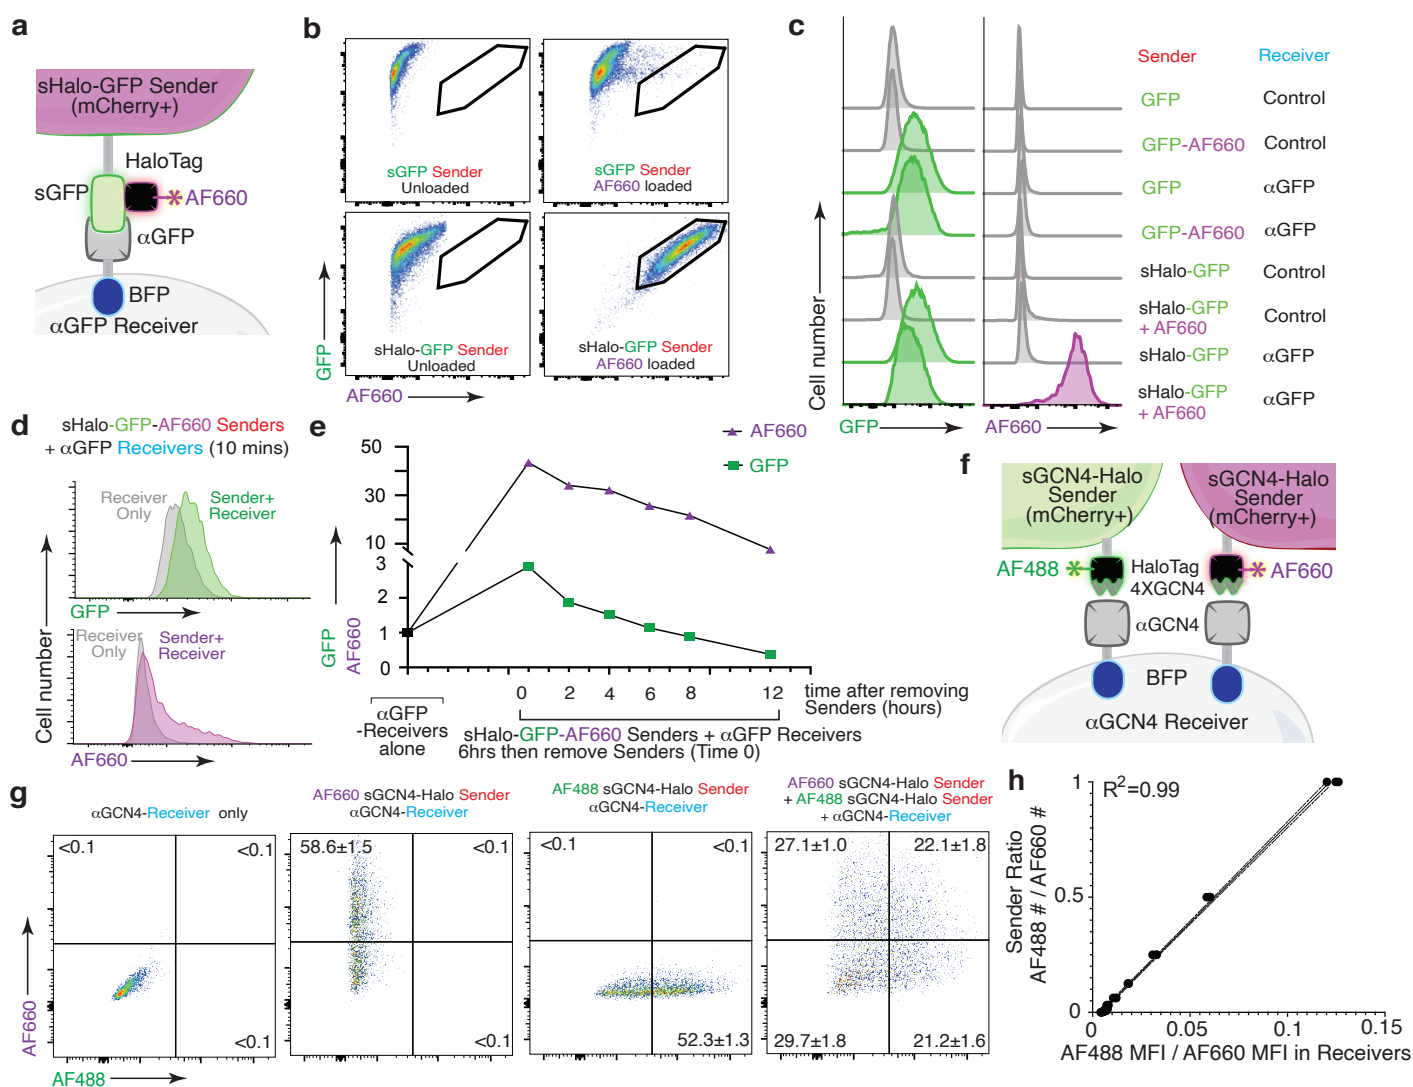

**Figure 7. HaloTag-baToN systems enable quantitative and sensitive cell-cell interaction-dependent receiver cell labeling.**

**a.** Diagram of HaloTag-baToN system. Sender cells (marked by intracellular 2A-mCherry) express surface HaloTag-GFP fusion which can be loaded with HaloTag ligands (in this example AF660). Receiver cells express αGFP (LaG17, tagged by intracellular BFP).

**b.** Labeling HaloTag-expressing sender cells with AF660 fluorophore. Representative FACS plots of KP (lung adenocarcinoma) sender cells expressing either sGFP or sGFP-sHaloTag incubated with AF660-conjugated HaloTag ligand for 5 minutes on ice. AF660 specifically labeled sHaloTag-GFP sender cells but not sGFP sender cells.

**c.** Representative histogram of GFP and AF660 intensity in αGFP 293 receiver cells cultured with HaloTag-GFP sender cells at a 1:1 ratio for 6 hours. Receivers were defined as mCherry<sup>neg</sup>PI<sup>neg</sup>BFP<sup>pos</sup> cells.

**d.** AF660 transfer to αGFP 293 receiver cell is rapid after cell-cell interaction. AF660 MFI shift was detected after mixing sHalo-GFP senders and αGFP receivers and co-culture for 10 minutes. AF660 MFI shift was more dramatic than GFP. Receivers were defined as mCherry<sup>neg</sup>PI<sup>neg</sup>BFP<sup>pos</sup> cells.

**e.** Slower AF660 quenching in touched receiver cells after removing sHalo-GFP senders. After 6 hours co-culture, GFP/AF660 positive receiver cells were purified via FACS. Analysis of GFP/AF660 MFI in purified receiver cells showed rapid GFP degradation but slower AF660 quenching. Receivers were defined as mCherry<sup>neg</sup>PI<sup>neg</sup>BFP<sup>pos</sup> cells.

**f.** Diagram of dual color GCN4-HaloTag-baToN system. Sender cells (marked by intracellular 2A-mCherry) express surface 4XGCN4 associated with HaloTag, loaded with either AF488- or AF660- conjugated HaloTag ligand. Receiver cells express αGCN4 (tagged by intracellular BFP).

**g.** Representative FACS plots of αGCN4 receiver cells co-cultured with the indicated sender cells at 1:1 (for single sender cell) or 1:1:1 (for dual sender cells) ratios. Percent of labeled receiver cells (gated as mCherry<sup>neg</sup>PI<sup>neg</sup>BFP<sup>pos</sup>) after 6 hours of co-culture is indicated as mean ± SD of triplicate cultures.

**h.** AF488/AF660 GCN4-HaloTag sender ratio in the co-culture directly proportional to AF488/AF660 intensity (MFI) of αGCN4 receiver after 6 hours of co-culture. Receivers were defined as mCherry<sup>neg</sup>PI<sup>neg</sup>BFP<sup>pos</sup> cells.



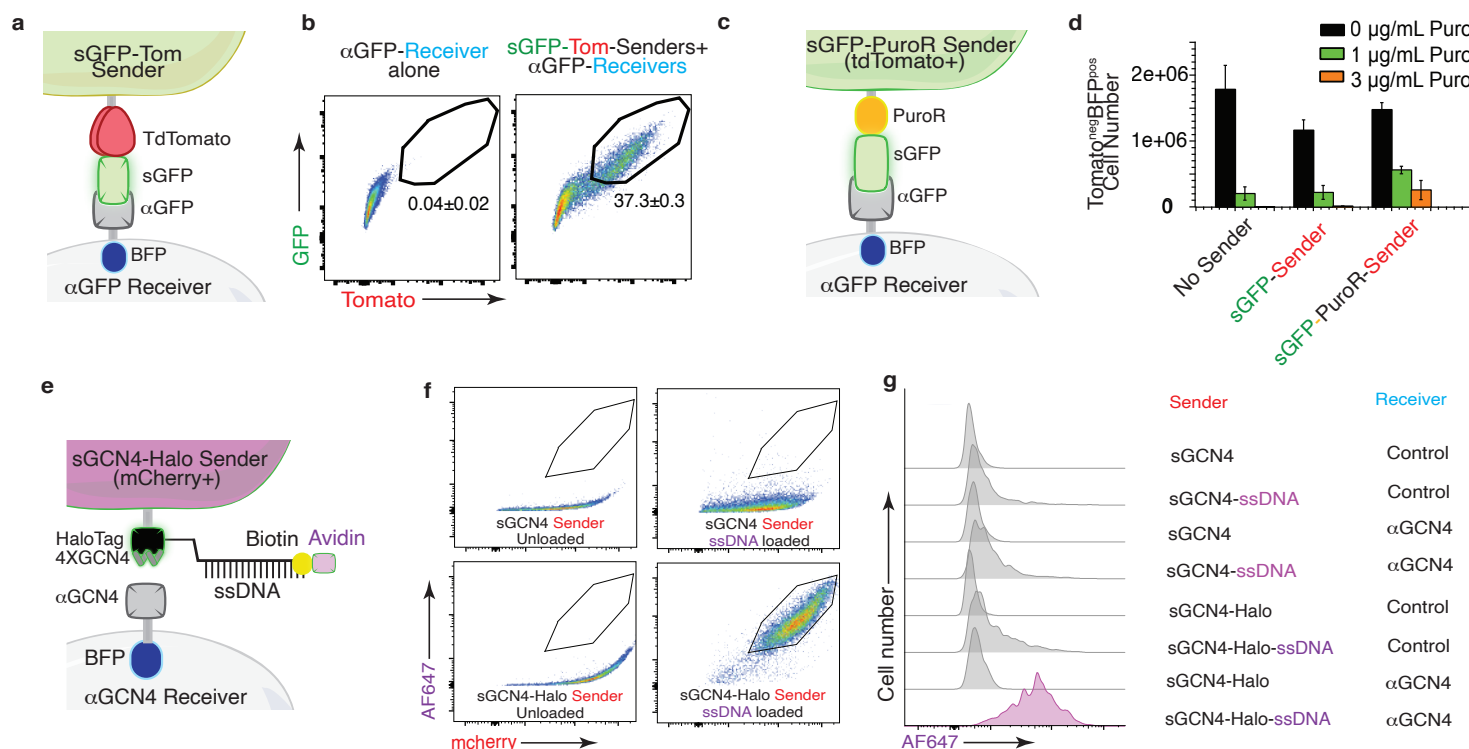

**Figure 8. The G-baToN system can co-transfer cargo molecules into touched receiver cells.**

**a.** Diagram of surface tdTomato-GFP (sGFP-Tom) co-transfer into touched receiver cells. Sender cell expresses sGFP-tdTomato and receiver cell expresses αGFP (tagged by intracellular BFP).

**b.** Representative FACS plots of αGFP 293 receiver cells cultured with the indicated sender cells at 1:1 ratio for 24 hours. Percent of GFP/Tomato dual labeled receiver cells is indicated as mean  $\pm$  SD of BFP<sup>pos</sup> cells from triplicate cultures.

**c.** Diagram of GFP-PuroR co-transfer system. Sender cell expresses surface GFP associated with PuroR (marked by intracellular tdTomato), receiver cell expresses αGFP (tagged by intracellular BFP). PuroR: Gcn5-related N-acetyltransferase.

**d.** Co-transfer of GFP-PuroR from sGFP-PuroR sender cells to αGFP 293 receiver cells confers puromycin resistance to receiver cells.

Control, sGFP or sGFP-PuroR sender cells were co-cultured with αGFP 293 receiver cells for 24 hours at a 4:1 ratio before treatment with different dose of puromycin for 48 hours. tdTomato<sup>neg</sup>PI<sup>neg</sup>BFP<sup>pos</sup> cell numbers were counted via FACS.

**e.** Diagram of using GCN4-HaloTag sender to transfer ssDNA into αGCN4 receiver cells. Sender cells (marked by intracellular 2A-mCherry) express surface 4XGCN4 associated with HaloTag, loaded with 5' HaloTag ligand, 3' biotin dual conjugated ssDNA (21 nt), then stained with Avidin-AF647. Receiver cells express αGCN4 (tagged by intracellular BFP).

**f.** Loading of sender cells with ssDNA. Representative FACS plots of 293 sender cells expressing either sGCN4 or sGCN4-Halo were loaded with 5' HaloTag-ligand, 3' biotin dual conjugated ssDNA (21nt), then stained with Avidin-AF647. AF647 specifically labeled loaded sGCN4-Halo sender cells but not sGCN4 sender cells.

**g.** Representative plot of AF647 intensity in αGCN4 293 receiver cells co-cultured with GCN4-HaloTag 293 sender cells at a 1:1 ratio for 6 hours. Receivers were defined as mCherry<sup>neg</sup>PI<sup>neg</sup>BFP<sup>pos</sup> cells.

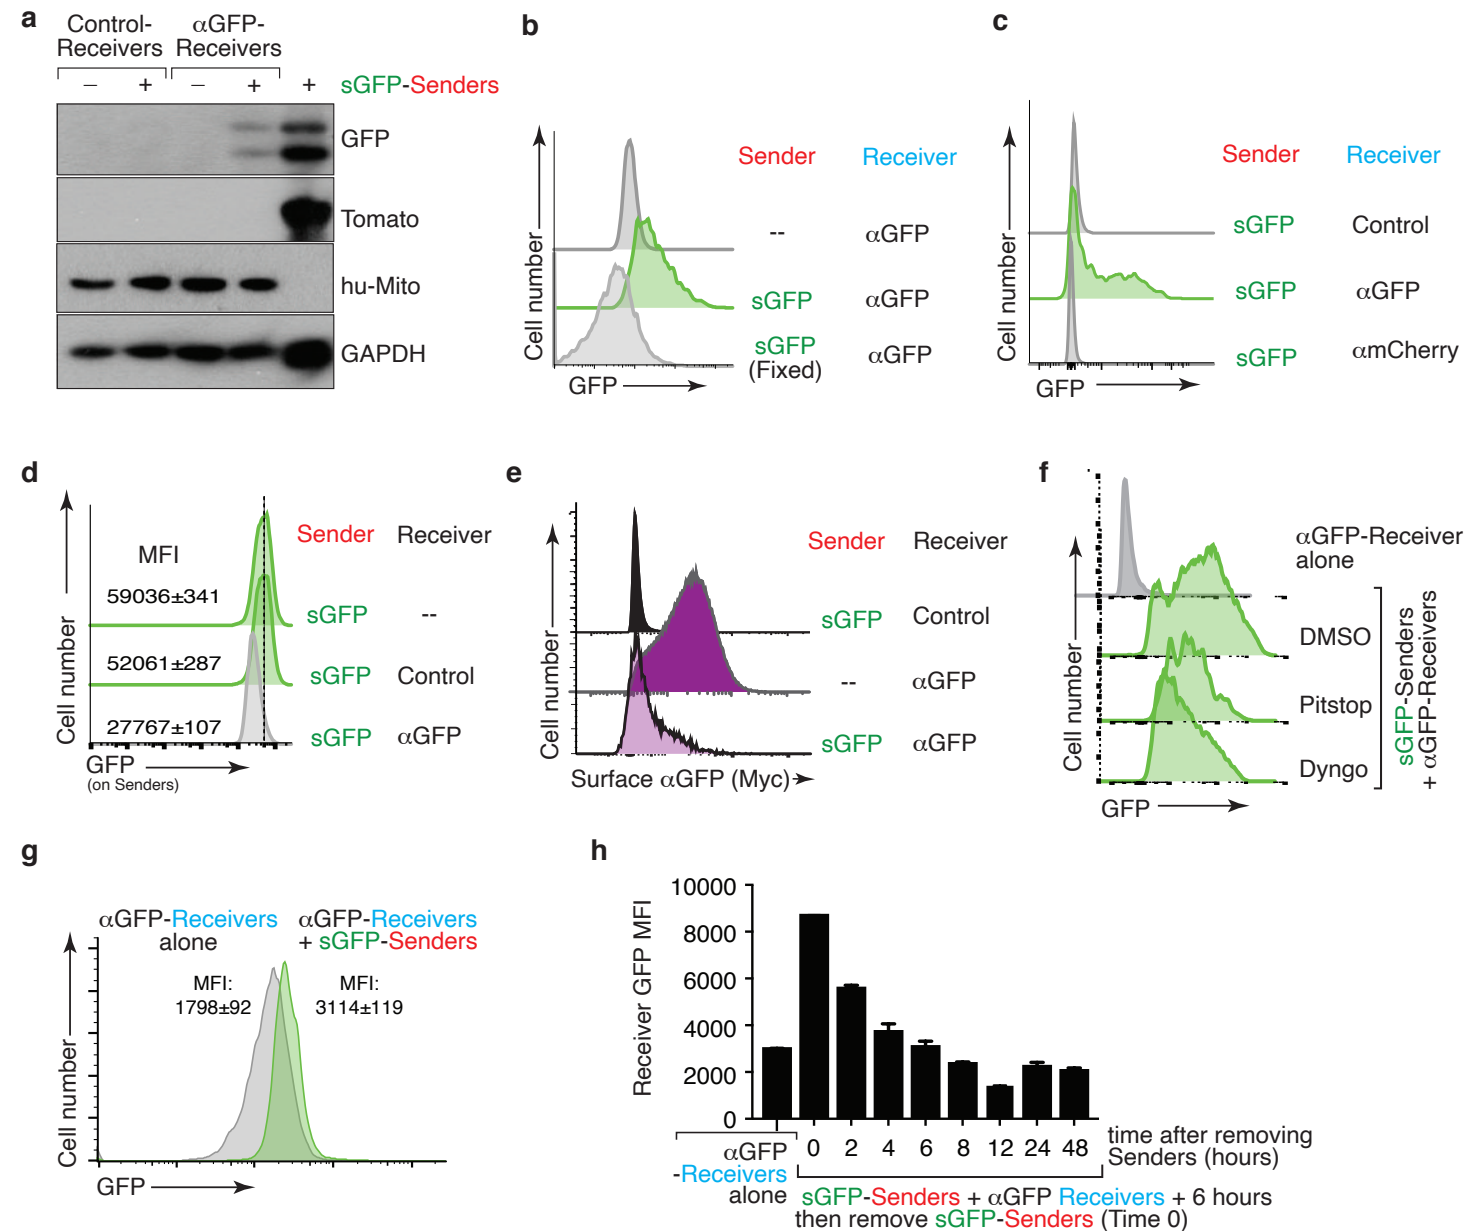

### Supplementary Figure 1. GFP transfer requires direct GFP- $\alpha$ GFP interaction.

**a.** GFP protein is transferred to receiver cells. Western blot analysis of FACS purified Control and  $\alpha$ GFP receiver 293 cells cultured in isolation or co-culture with sGFP Tomato-positive sender cells (mouse KPT lung cancer cells) for 24 hours. sGFP but not Tomato is present in touched  $\alpha$ GFP receiver cells. Human mitochondrial antigen (hu-Mito) is a marker for receiver cells. GAPDH shows loading. Rightmost lane is sGFP sender cells.

**b.** GFP cannot be transferred from fixed sGFP sender cells to live  $\alpha$ GFP receiver cells. sGFP sender cells were fixed in 1% PFA for 5 minutes and washed with PBS before co-cultured with  $\alpha$ GFP receiver cells at a 1:1 ratio for 24 hours. Receivers were defined as Tomato<sup>neg</sup>PI<sup>neg</sup>BFP<sup>pos</sup> cells.

**c.** GFP transfer to 293 receiver cells required sGFP- $\alpha$ GFP recognition. GFP is transferred from sGFP sender cells to  $\alpha$ GFP-receiver cells but not from sGFP sender cells to amCherry-receiver cells. Control receiver cells do not express any nanobody. Sender and receiver cells were co-cultured at a 1:1 ratio for 24 hours. Receivers were defined as Tomato<sup>neg</sup>PI<sup>neg</sup>BFP<sup>pos</sup> cells.

**d.** GFP transfer to receiver cells is accompanied by a reduction of GFP on the sender cells. GFP expression on sender cells after 24 hour co-culture with control or  $\alpha$ GFP-expressing 293 receiver cells at a 1:1 ratio. Co-culture with  $\alpha$ GFP expressing but not control receiver cells reduced GFP on sGFP sender cells. Senders were defined as Tomato<sup>pos</sup>DAPI<sup>neg</sup>BFP<sup>neg</sup> cells.

**e.** GFP transfer is accompanied with  $\alpha$ GFP internalization on receiver cells. Analysis of surface  $\alpha$ GFP (Myc-tag) on 293 receiver cell co-cultured for 24 hours with sGFP sender cells. Receivers were defined as Tomato<sup>neg</sup>PI<sup>neg</sup> cells.

**f.** GFP transfer to 293 receiver cells is partially dependent on membrane dynamics of endocytosis. Both a clathrin inhibitor (Pitstop, 20  $\mu$ M) and a dynamin inhibitor (Dyngo 4a, 10  $\mu$ M) partially inhibit GFP transfer from sGFP sender cells to  $\alpha$ GFP receivers. Inhibitors were present during the 24 hour co-culture. Receivers were defined as Tomato<sup>neg</sup>PI<sup>neg</sup> cells.

**g.** GFP transfer to  $\alpha$ GFP 293 receiver cells can be very rapid. A shift in GFP MFI was detected 5 minutes after mixing sGFP sender cells with  $\alpha$ GFP receiver cell. Receivers were defined as Tomato<sup>neg</sup>PI<sup>neg</sup>BFP<sup>pos</sup> cells. MFI mean  $\pm$  SD of triplicate cultures is shown.

**h.** Rapid GFP degradation in touched receiver cells after removal of the sGFP sender cells. After 6 hours co-culture, GFP positive receiver cells were purified by FACS followed by culture without sender cells. Receivers were defined as mCherry<sup>neg</sup>PI<sup>neg</sup>BFP<sup>pos</sup> cells. GFP MFI in receiver cells reduced rapidly ( $T_{1/2}$  approximately 2 hours). MFI mean  $\pm$  SD of triplicate cultures is shown.

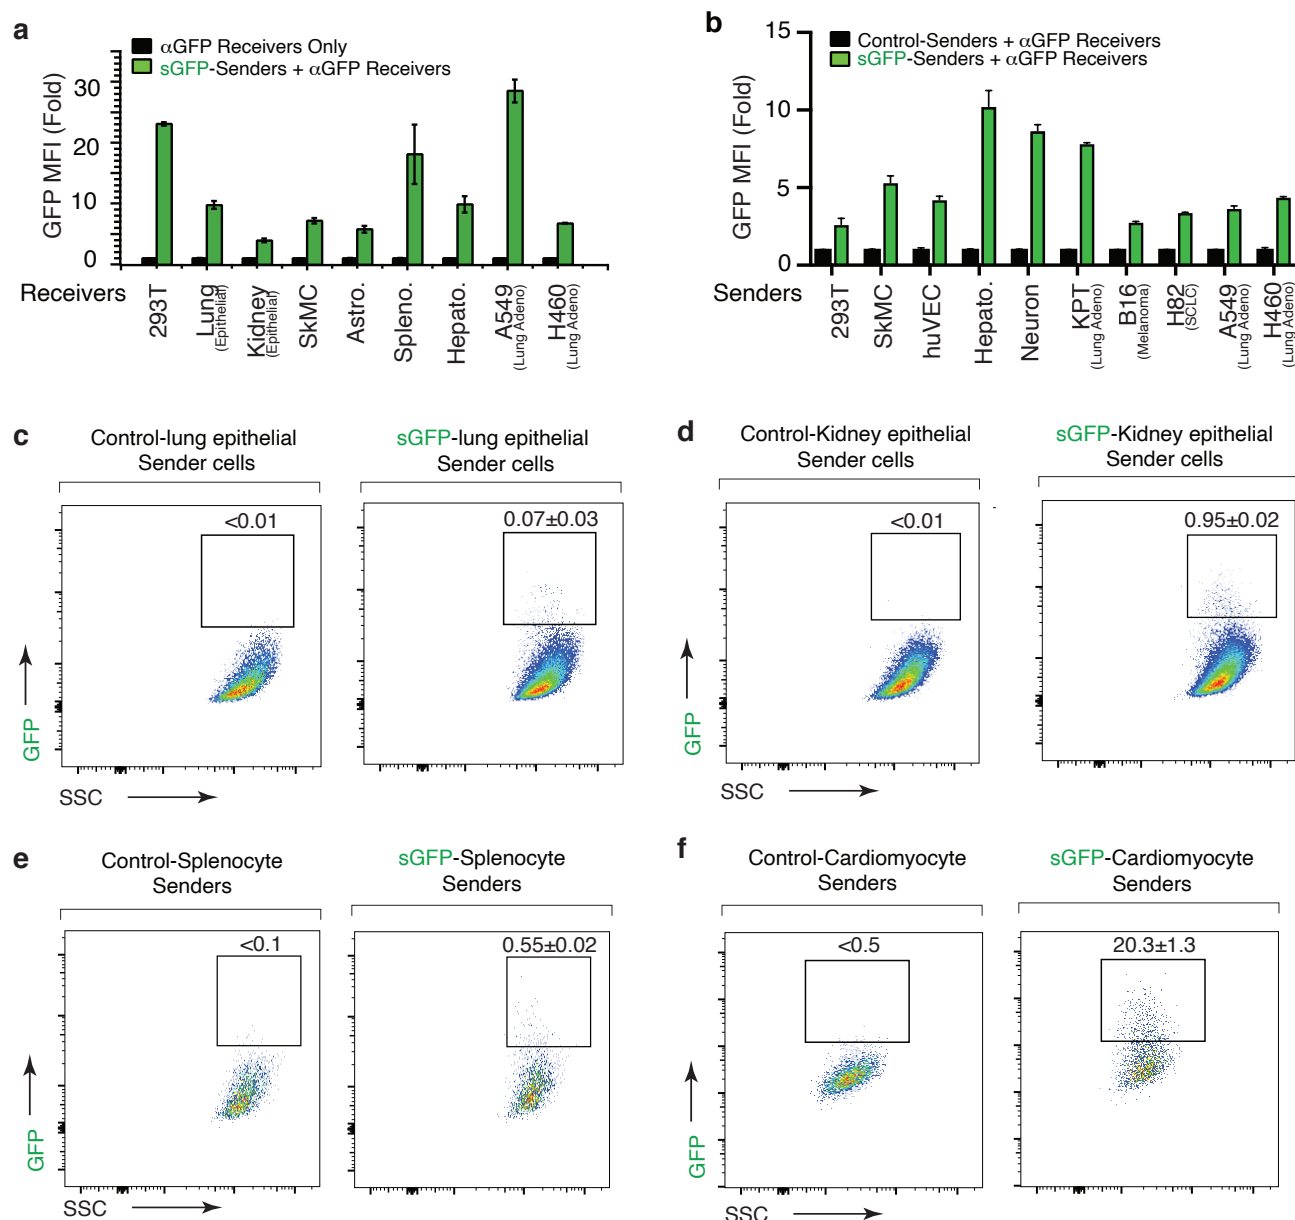

**Supplementary Figure 2. G-baToN is a generalized system that can be used for touching-based labeling between various cell types.**

**a.** Many different cell lines and primary cell types can serve as receiver cells. Receiver cells expressing  $\alpha$ GFP were co-cultured with sGFP-expressing KPT sender cells for 24 hours. MFI of GFP on Tomato<sup>neg</sup>PI<sup>neg</sup>BFP<sup>pos</sup> receiver cells was assessed by FACS analysis and is shown as fold change relative to monocultured receiver cells. For lung epithelial cells and kidney epithelial cells MFI of GFP on Tomato<sup>neg</sup>PI<sup>neg</sup>BFP<sup>pos</sup>EpCAM<sup>pos</sup> cells is shown as mean  $\pm$  SD of triplicate cultures. SkMC: skeletal muscle cells. Astro: Astrocytes. Hepato: hepatocytes. Spleno: splenocytes.

**b.** Many different cell lines and primary cell types can serve as sender cells. Sender cells expressing sGFP were co-cultured with  $\alpha$ GFP 293 receiver cells for 24 hours. MFI of GFP on mCherry<sup>neg</sup>PI<sup>neg</sup>BFP<sup>pos</sup> receiver cells was assessed by flow cytometry and is shown as fold change relative to monocultured 293 receiver cells. Mean  $\pm$  SD of triplicate cultures is shown.

**c,d,e,f.** Diverse primary mouse cells expressing sGFP can transfer GFP to  $\alpha$ GFP 293 receivers. Different primary sender cells were first sorted based on their cell surface markers, then transduced with lentiviral vectors expressing sGFP before being co-cultured with  $\alpha$ GFP 293 receiver cells for 24 hours. Percentage of mCherry<sup>neg</sup>PI<sup>neg</sup>BFP<sup>pos</sup>GFP<sup>pos</sup> receiver cells was assessed by flow cytometry. For each primary sender, approximate sGFP<sup>pos</sup> sender :  $\alpha$ GFP<sup>pos</sup> receiver ratio is indicated: **c.** Lung epithelial cells (1:180) (sorted EpCAM<sup>pos</sup> cells from dissociated adult lung); **d.** Kidney epithelial cells (1:20) (sorted EpCAM<sup>pos</sup> cells from dissociated adult kidney); **e.** Splenocyte (1:20); **f.** Cardiomyocyte (1:5) (sorted Sirpa<sup>pos</sup> cells from dissociated adult heart). Percent of labeled cells is indicated as mean  $\pm$  SD of triplicate cultures.



Tang *et al.*

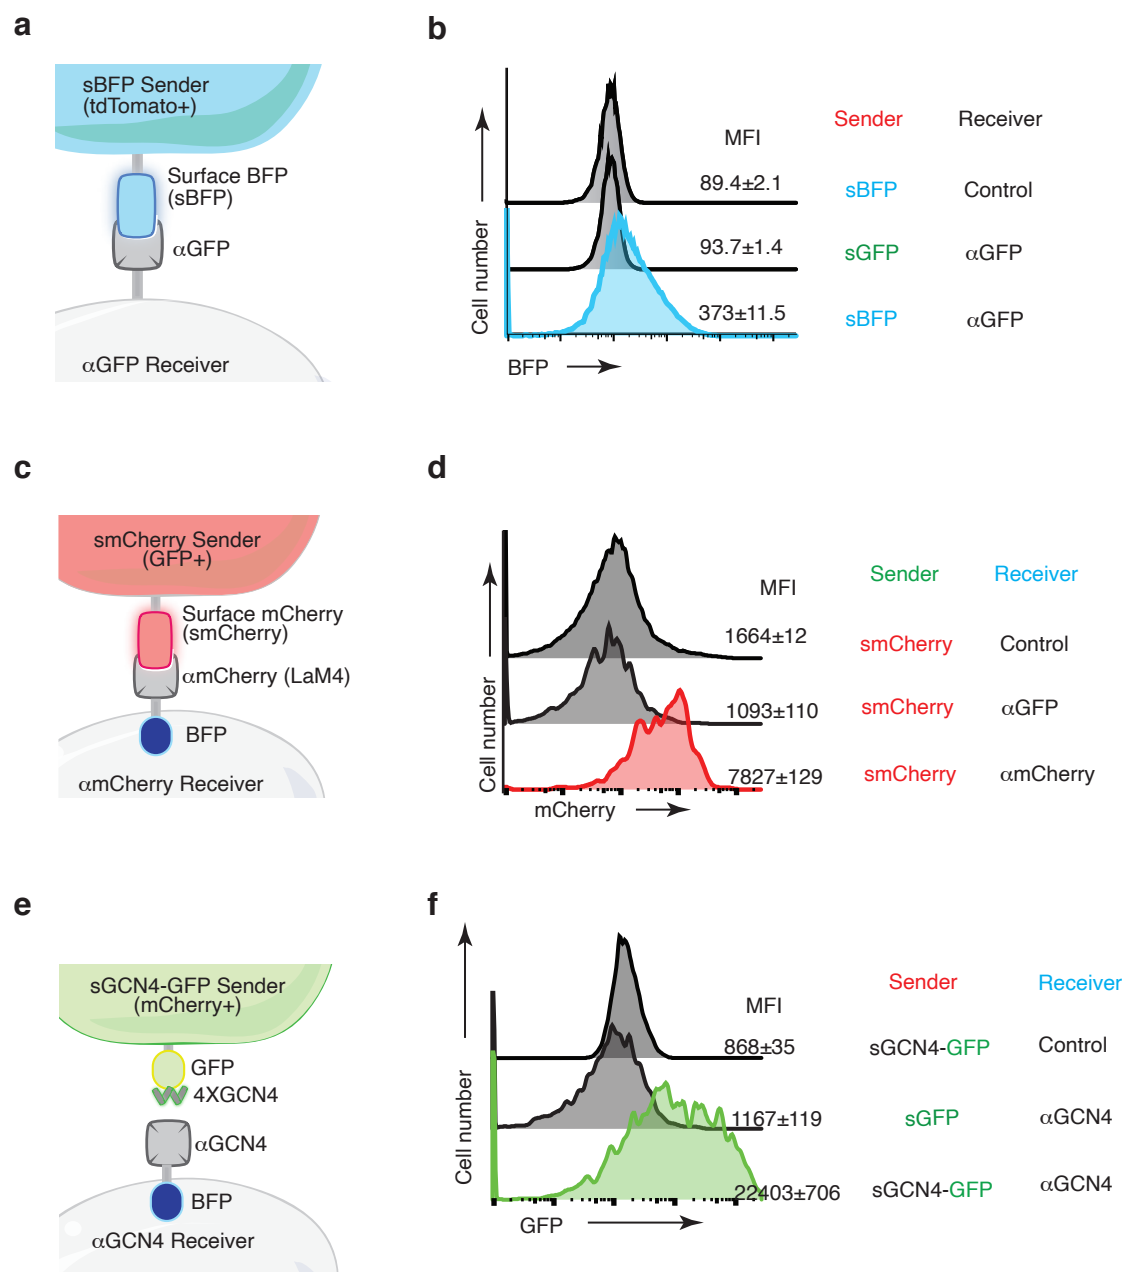

**Supplementary Figure 3. X-baToN systems enable fluorescent labeling via various antigen-nanobody/scFV pairs.**

**a.** Schematic of the surface BFP (sBFP)-baToN system. Sender cell (marked by intracellular tdTomato) expresses sBFP and receiver cell expresses  $\alpha$  GFP.

**b.** The cross reactivity of  $\alpha$ GFP with BFP allow BFP to be transferred from sBFP sender to  $\alpha$ GFP receiver cells. sBFP senders and  $\alpha$ GFP receivers were co-cultured at 1:1 ratio for 24 hours. Receivers were defined as toTomato<sup>neg</sup>PI<sup>neg</sup> cells. BFP MFI of receiver cells is shown as mean  $\pm$  SD of triplicate cultures.

**c.** Schematic of the surface mCherry (smCherry)-baToN system. Sender cell (marked by intracellular GFP) expresses smCherry and receiver cell expresses  $\alpha$ mCherry (tagged by intracellular BFP)

**d.** The pairing between mCherry and  $\alpha$ mCherry enable mCherry transfer from smCherry 293 Sender cells to  $\alpha$ mCherry-expressing 293 Receiver cells. smCherry senders are not able to transfer mCherry to  $\alpha$ GFP receiver cells. smCherry sender cells were co-cultured with  $\alpha$ GFP or  $\alpha$ mCherry receiver cells at a 1:1 ratio for 24 hours. Receivers were defined as GFP<sup>neg</sup>BFP<sup>pos</sup> cells. mCherry MFI of receiver cell is shown as mean  $\pm$  SD of triplicate cultures. smCherry 293 sender is not able to transfer mCherry to  $\alpha$ GFP 293 receiver.

**e.** Schematic of the surface GCN4 (sGCN4)-baToN system. Sender cells (marked by intracellular 2A-mCherry) express cell surface 4X GCN4 peptide fused with GFP. Receiver cells express a cell surface anti-GCN4 single-chain variable fragment (scFV;  $\alpha$ GCN4, tagged by intracellular BFP).

**f.** The pairing between GCN4 and  $\alpha$ GCN4 enables co-transfer of GFP from 4X sGCN4-GFP senders to  $\alpha$ GCN4 receivers 24 hours after co-culture at a 1:1 ratio. Receivers were defined as mCherry<sup>neg</sup>PI<sup>neg</sup>BFP<sup>pos</sup> cells. GFP MFI of receiver cell is shown as mean  $\pm$  SD of triplicate cultures. sGFP sender are not able to transfer GFP to  $\alpha$ GCN4 receivers.

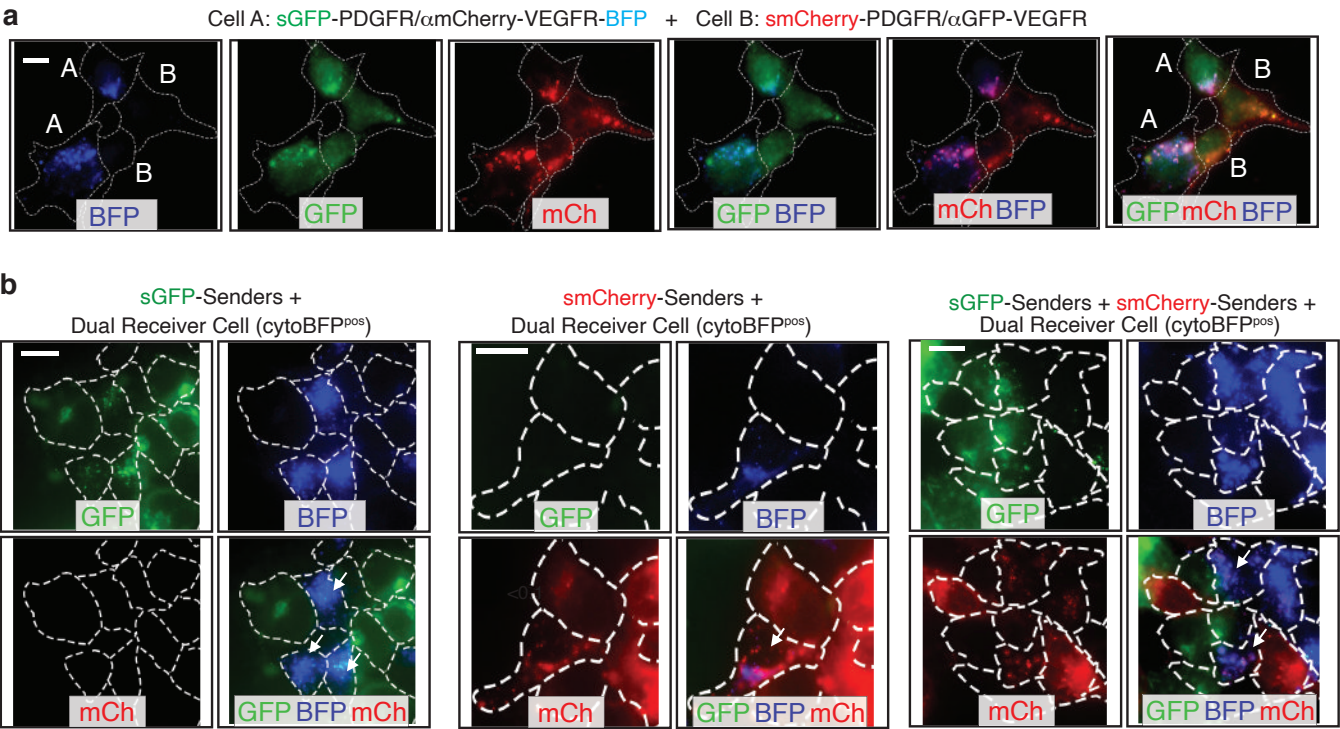

**Supplementary Figure 4. Dual color-baToN systems enable labeling in complex cell-cell interaction systems.**

**a.** Representative image of reciprocal labeling of cell A and cell B co-cultured for 24 hours. Cells are outlined with a white dashed line. Cell A is BFP and GFP double positive and Cell B is mCherry positive. Touched cell A is BFP, GFP and mCherry triple positive and touched cell B is GFP and mCherry double positive (pointed out by white letter). Scale bar: 10  $\mu$ m.

**b.** Representative image of dual receiver cells co-cultured with indicated sender cells. Cells are outlined with a white dashed line. Dual receiver cells are BFP positive and sender touched dual receiver cells are pointed out by white arrows. Scale bar: 10  $\mu$ m.

Tang *et al.*

|                                                       | <b>synNotch</b><br>(Morsut <i>et al.</i> , Cell, 2016)                                                                                           | <b>LIPSTIC</b><br>(Pasqual <i>et al.</i> , Nature, 2018)                                                                            | <b>G-baToN</b><br>(This manuscript)                                                                                                                                                |
|-------------------------------------------------------|--------------------------------------------------------------------------------------------------------------------------------------------------|-------------------------------------------------------------------------------------------------------------------------------------|------------------------------------------------------------------------------------------------------------------------------------------------------------------------------------|
| <b>Cell-cell interaction</b>                          |                                                                                                                                                  |                                                                                                                                     |                                                                                                                                                                                    |
| <b>Receiver Cell after interaction</b>                |                                                                                                                                                  |                                                                                                                                     |                                                                                                                                                                                    |
| <b>Basis of the labeling</b>                          | Notch intracellular cleavage leads to transcription factor release and activation of a reporter                                                  | Covalent labeling of receptor by ligand associated enzyme                                                                           | Ligand internalization                                                                                                                                                             |
| <b>Additional requirement for labeling</b>            | Engineered reporter in receiver cells                                                                                                            | Labeling substrate                                                                                                                  | None                                                                                                                                                                               |
| <b>Determinants of label half-life after touching</b> | Transcription factor half-life and reporter mRNA and protein half-life in the receiver cell                                                      | Labeled protein half-life on the receiver cell                                                                                      | Half-life of transferred protein or fluorophore in the receiver cell                                                                                                               |
| <b>Advantages</b>                                     | Generic sender and receivers<br>Generalizable across cell type<br>Compatible with AND gates<br>Tf can drive expression of many genes of interest | Requirement for exogenous substrate adds temporal control of labelling<br>Conceptually generalizable to other receptor ligand pairs | Simple two-component system<br>Low background<br>Single cell level sensitivity<br>Generalizable across cell type<br>Generic sender and receivers<br>Complex cell-cell interactions |
| <b>Potential disadvantages</b>                        | Engineered ligand-receptor interactions could influence cell-cell contact<br>Background activation or reporter could be leaky                    | Requires knowledge of receptor-ligand interactions between cell types of interest                                                   | Engineered ligand-receptor interactions could influence cell-cell contact                                                                                                          |

**Supplementary Figure 5. Features of the synNotch, LIPSTIC, and G-BaToN cell-cell interaction reporter systems.**  
Overview of systems that enable labeling of cells after cell-cell contact.
